# Supplementary material
Source: MDPI journal article supplement (https://www.mdpi.com/1424-8247/16/7/958)

# Identification and Biological Characterization of the Pyrazolo[3,4-*d*]pyrimidine Derivative SI388 Active as Src Inhibitor

Claudia Contadini <sup>1,2,†</sup>, Claudia Cirotti <sup>1,2,†</sup>, Anna Carbone <sup>3</sup>, Mehrdad Norouzi <sup>1,2</sup>, Annarita Cianciusi <sup>3</sup>, Emmanuele Crespan <sup>4</sup>, Cecilia Perini <sup>4</sup>, Giovanni Maga <sup>4</sup>, Daniela Barilà <sup>1,2,\*</sup>, Francesca Musumeci <sup>3,\*</sup> and Silvia Schenone <sup>3</sup>

<sup>1</sup> Laboratory of Cell Signaling, IRCCS-Fondazione Santa Lucia, 00179 Rome, Italy; claudiacontadini@gmail.com (C.C.); claudiacirotti89@gmail.com (C.C.)

<sup>2</sup> Department of Biology, University of Rome "Tor Vergata", 00133 Rome, Italy

<sup>3</sup> Department of Pharmacy, University of Genoa, Viale Benedetto XV, 3, 16132 Genoa, Italy; annar.cianciusi@gmail.com (A.C.); schenone@difar.unige.it (S.S.)

<sup>4</sup> Institute of Molecular Genetics (IGM), IGM-CNR, Via Abbategrosso 207, 27100 Pavia, Italy; giovanni.maga@igm.cnr.it (G.M.)

\* Correspondence: francesca.musumeci@unige.it (F.M.); daniela.barila@uniroma2.it (D.B.)

† These authors contributed equally to this work.

## Table of contents

- **Table S1.** Percentage of Src inhibition at 100, 10 and 1  $\mu$ M for compounds **2a-s**.
- Representative <sup>1</sup>H and <sup>13</sup>C NMR spectra of final compounds **2a-s** and intermediates **5b**, **6b**, **7a-h**, **8a**, **8c-g**.

**Table S1.** Percentage of Src inhibition at 100, 10 and 1  $\mu$ M for compounds **2a-s**.

| Cpd       | % inhib Src |            |           | % inhib Fyn |            |           | % inhib Abl |            |           |
|-----------|-------------|------------|-----------|-------------|------------|-----------|-------------|------------|-----------|
|           | 100 $\mu$ M | 10 $\mu$ M | 1 $\mu$ M | 100 $\mu$ M | 10 $\mu$ M | 1 $\mu$ M | 100 $\mu$ M | 10 $\mu$ M | 1 $\mu$ M |
| <b>2a</b> | N.D.        | 90         | N.D.      | N.D.        | 90.7       | x         | N.D.        | 72         | x         |
| <b>2b</b> | N.D.        | N.A.       | 24        | N.D.        | N.A.       | N.A.      | N.D.        | 23         | N.A.      |
| <b>2c</b> | N.D.        | 27         | 16        | N.D.        | 64         | 33        | N.D.        | 35         | 18        |
| <b>2d</b> | 99.5        | 34         | N.D.      | 26          | 8          | N.D.      | N.D.        | 24         | NA        |
| <b>2e</b> | N.D.        | N.A.       | N.A.      | N.D.        | N.D.       | N.D.      | N.D.        | 26,3       | NA        |
| <b>2f</b> | N.D.        | 79         | N.A.      | N.D.        | N.D.       | N.D.      | N.D.        | 67         | 3         |
| <b>2g</b> | N.D.        | 93.6       | 43.3      | N.D.        | N.D.       | N.D.      | N.D.        | 83         | 33.5      |
| <b>2h</b> | 98.3        | 12         | N.D.      | 82          | 57         | N.D.      | N.D.        | N.A.       | 34        |
| <b>2i</b> | 98.8        | 56         | N.D.      | 19          | 15         | N.D.      | N.D.        | N.A.       | N.A.      |
| <b>2j</b> | 95.3        | 5          | N.D.      | 38          | 13         | N.D.      | N.D.        | N.A.       | 39        |
| <b>2k</b> | 99.2        | 50.3       | N.D.      | 66          | 47         | N.D.      | N.D.        | 39         | N.A.      |
| <b>2l</b> | N.D.        | N.A.       | N.A.      | N.D.        | 10         | 19        | N.D.        | N.A.       | 40        |
| <b>2m</b> | N.D.        | 67         | N.A.      | N.D.        | 20         | 2.50      | N.D.        | 18         | 15        |
| <b>2n</b> | N.D.        | 13         | 11        | N.D.        | 23         | 16        | N.D.        | 18         | 5         |
| <b>2o</b> | N.D.        | N.A.       | N.A.      | N.D.        | 8          | N.A.      | N.D.        | N.A.       | N.A.      |
| <b>2p</b> | N.D.        | 55         | 14        | N.D.        | 60         | 15        | N.D.        | 12         | N.A.      |
| <b>2q</b> | N.D.        | 48         | 29        | N.D.        | 78         | 24        | N.D.        | 25         | 20        |
| <b>2r</b> | N.D.        | 7.5        | N.A.      | N.D.        | 75         | 48        | N.D.        | N.A.       | N.A.      |

|    |      |    |    |      |    |      |      |    |      |
|----|------|----|----|------|----|------|------|----|------|
| 2s | N.D. | 19 | 24 | N.D. | 54 | N.A. | N.D. | 23 | N.A. |
|----|------|----|----|------|----|------|------|----|------|

N.D. = Not determined

N.A. = Not Active

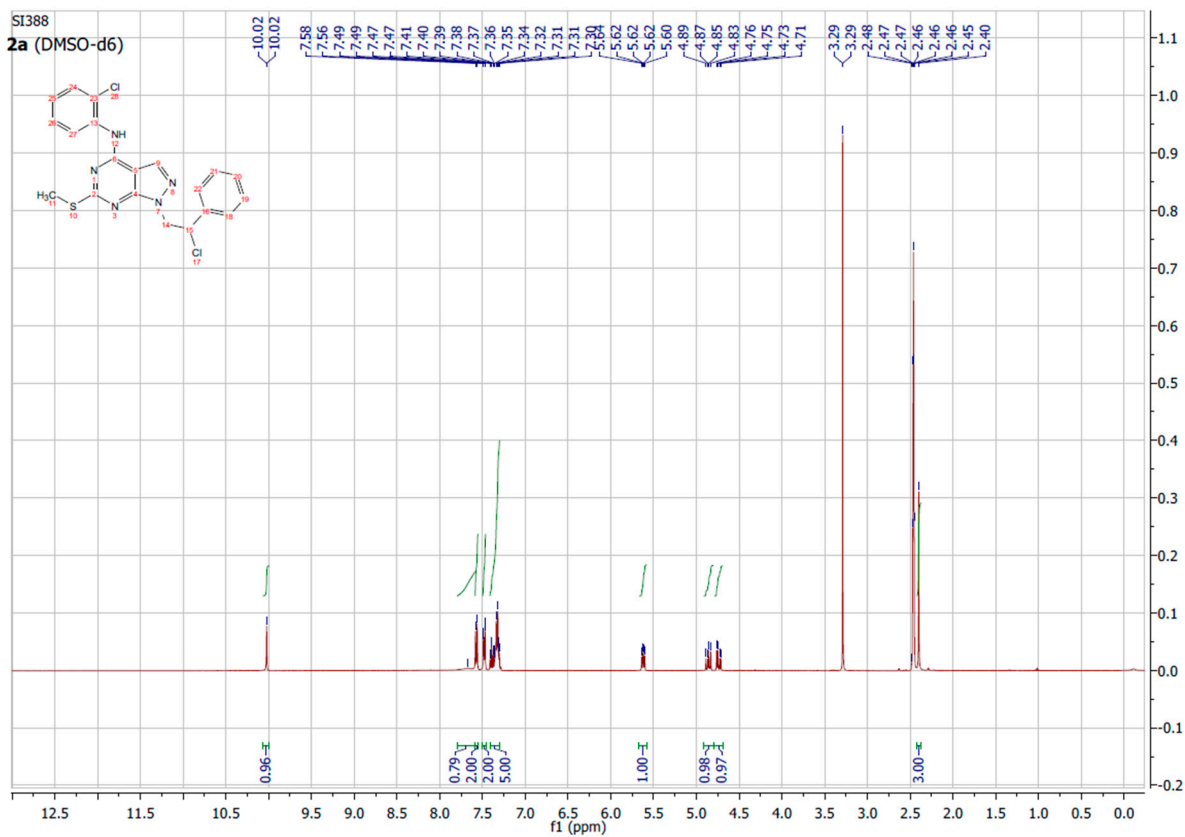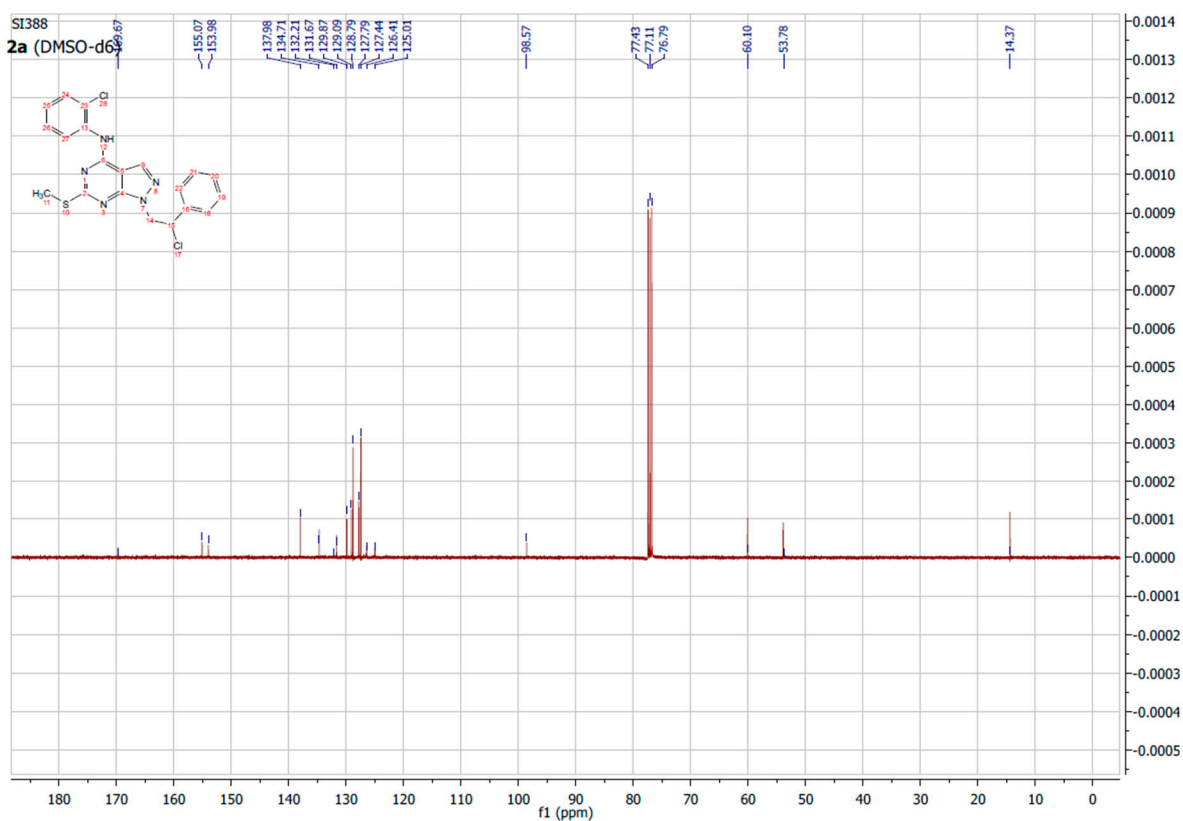

PM931 - 2b

Pulse Sequence: s2pul

Solvent: CDCl3

Ambient temperature

GEMINI-200 "gem2000"

Pulse 28.8 degrees

Acq. time 2.000 sec

Width 4000.0 Hz

96 repetitions

OBSERVE N1, 199.9417676 MHz

DATA PROCESSING

FT size 65536

Total time 17 min, 58 sec

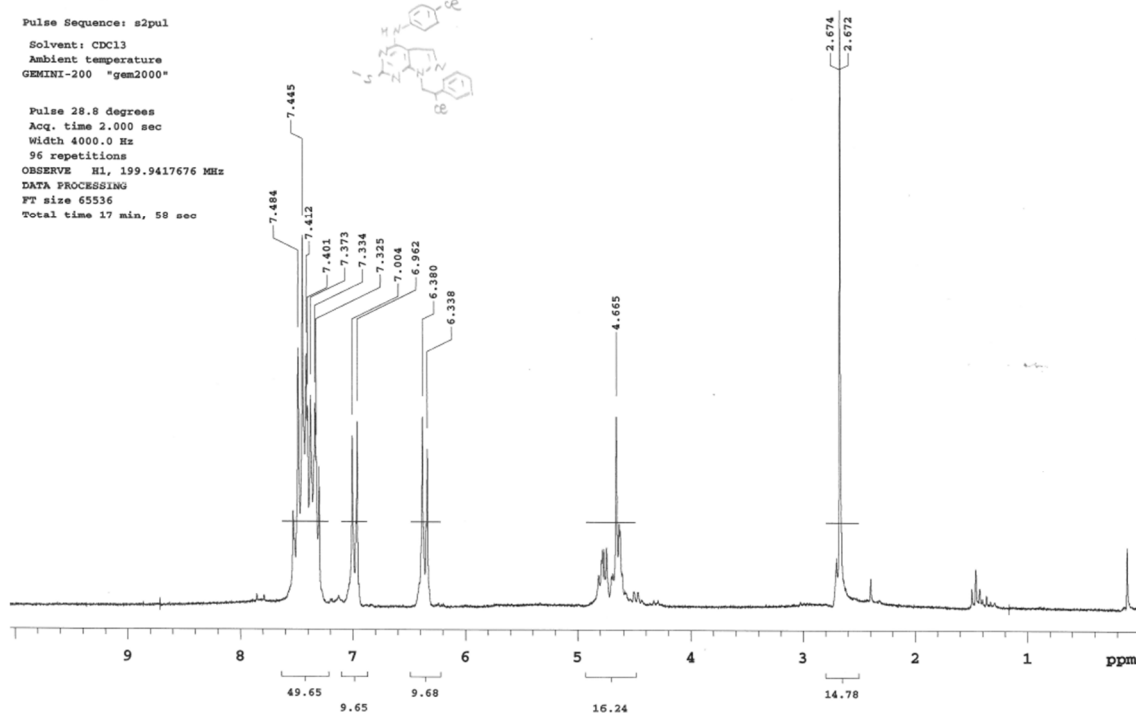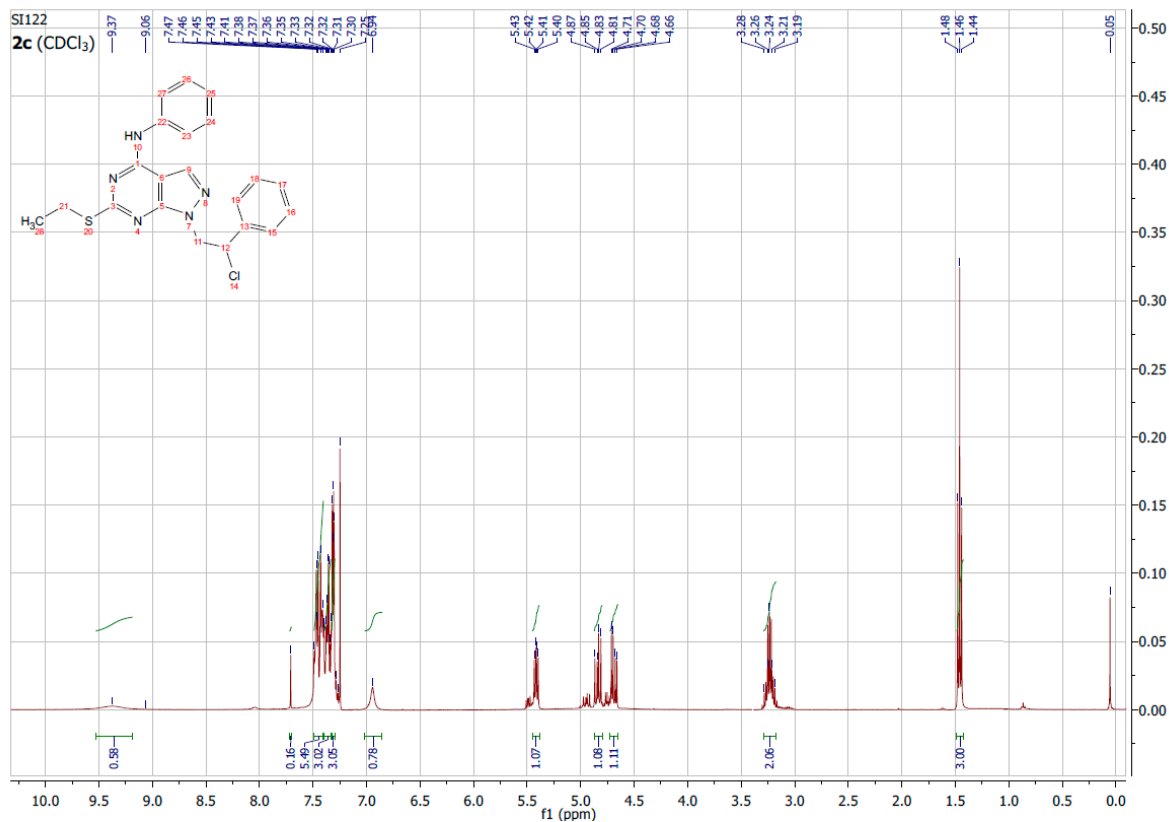

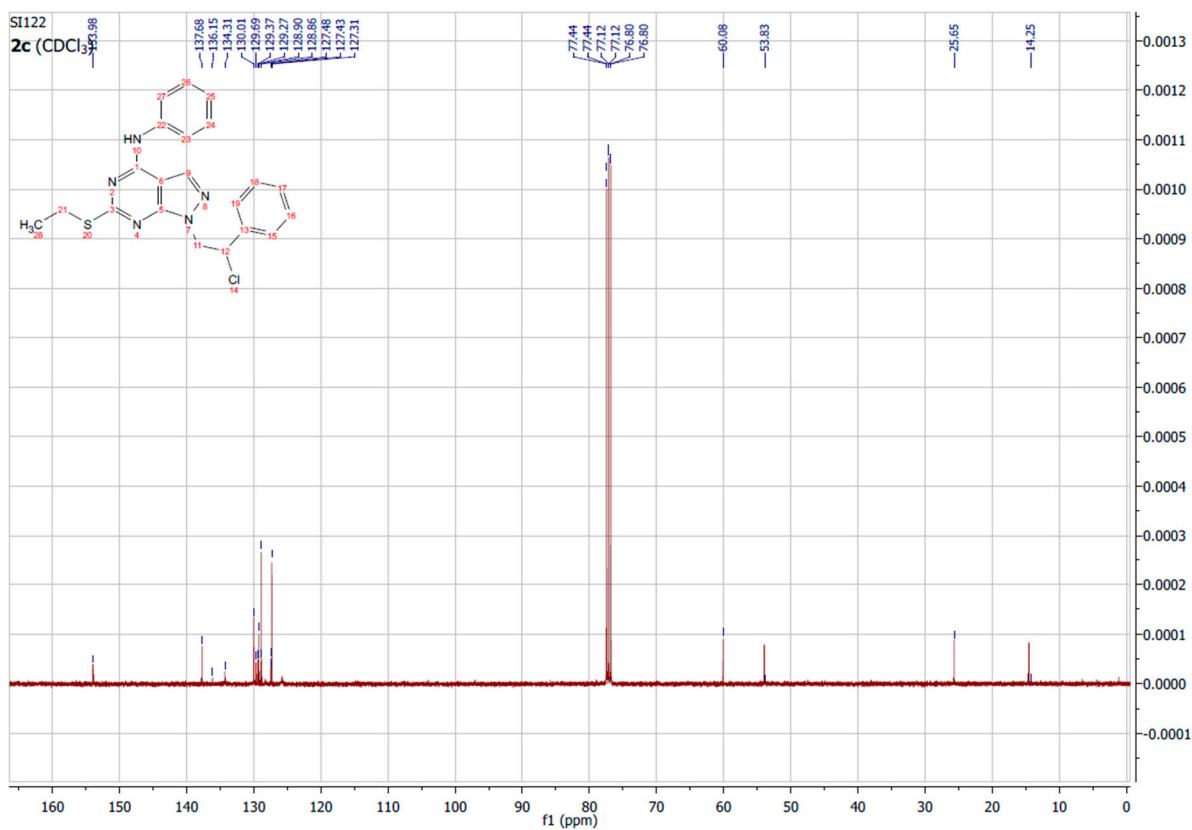

SI143 - 2b

Pulse Sequence: s2pul

Solvent: DMSO

Ambient temperature

GEMINI-200 "gem2000"

Pulse 28.8 degrees

Acq. time 2.000 sec

Width 4000.0 Hz

336 repetitions

ORSERVE N1, 199.9427173 MHz

DATA PROCESSING

FT size 65536

Total time 17 min, 58 sec

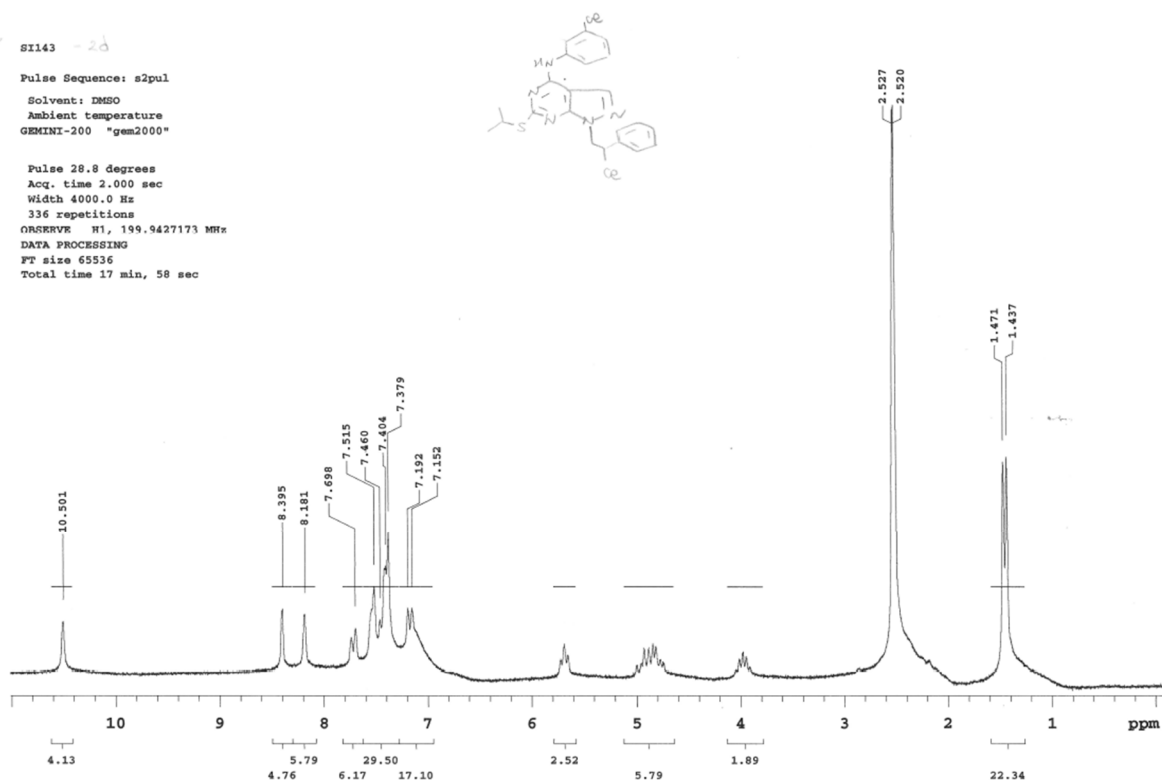



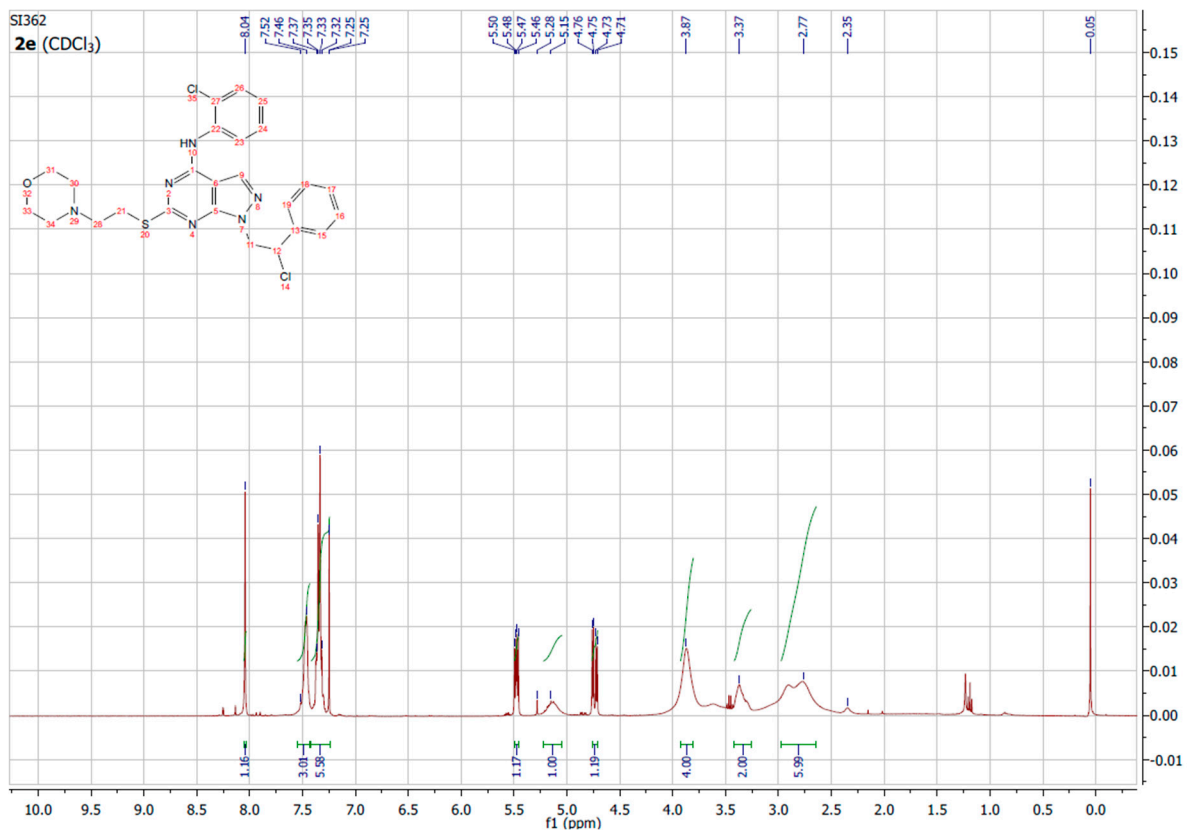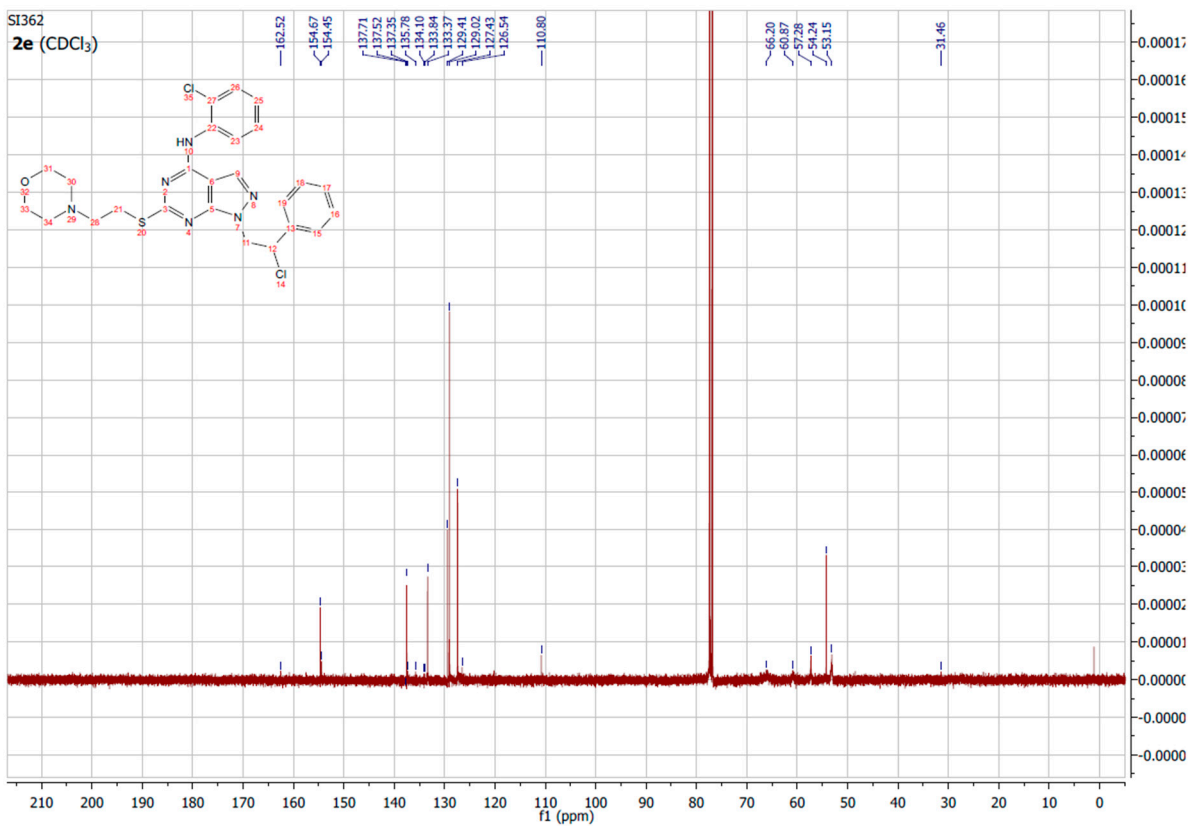

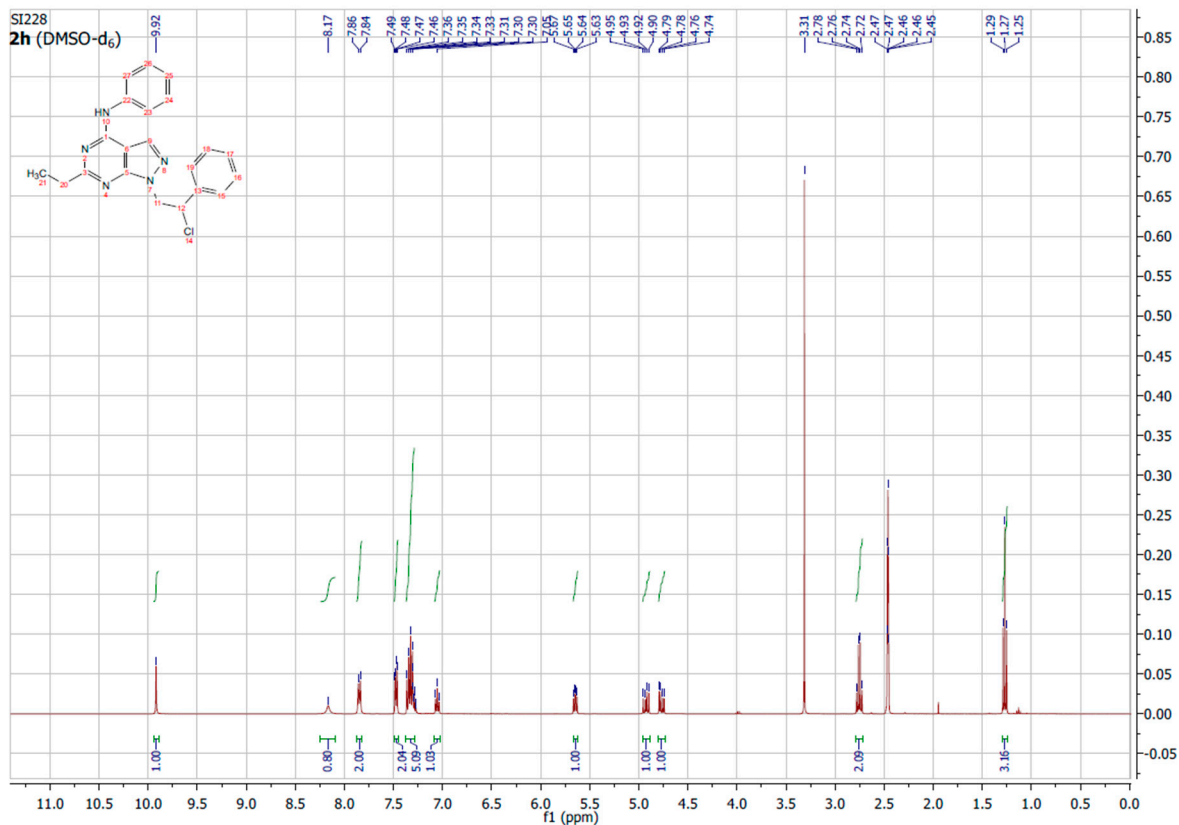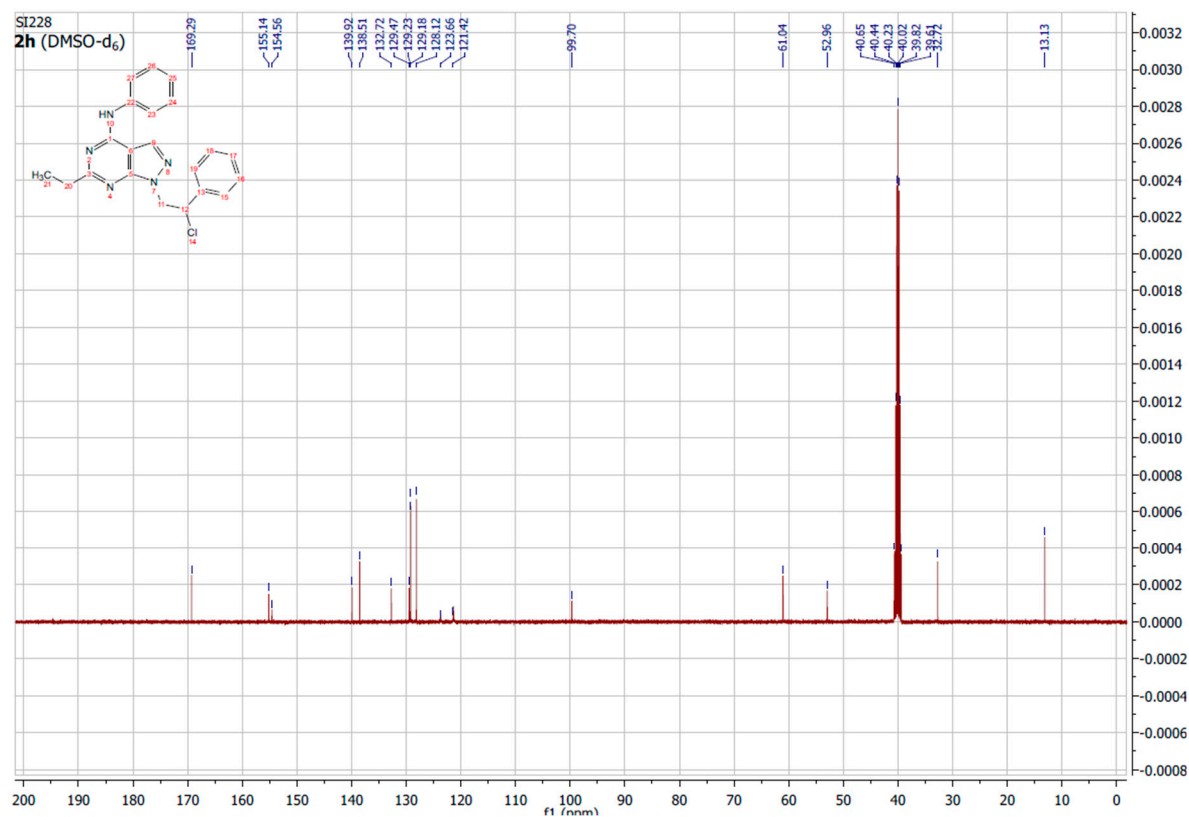

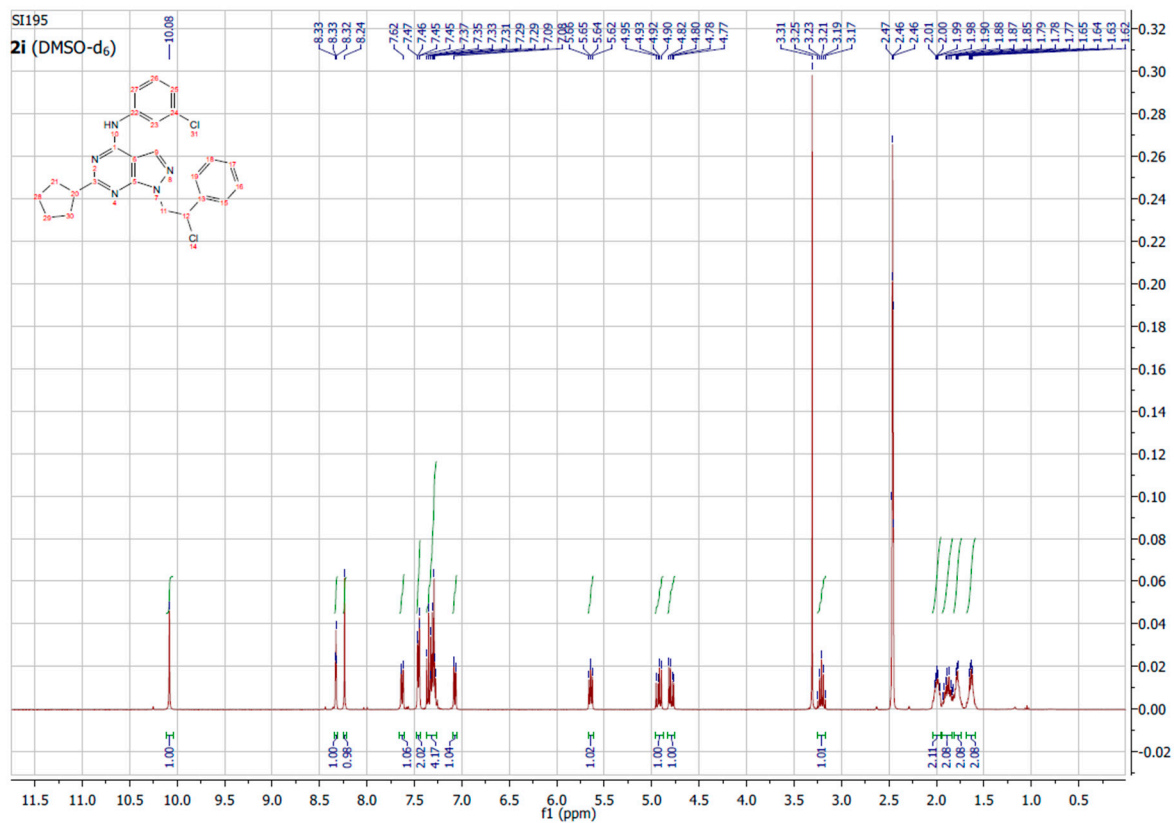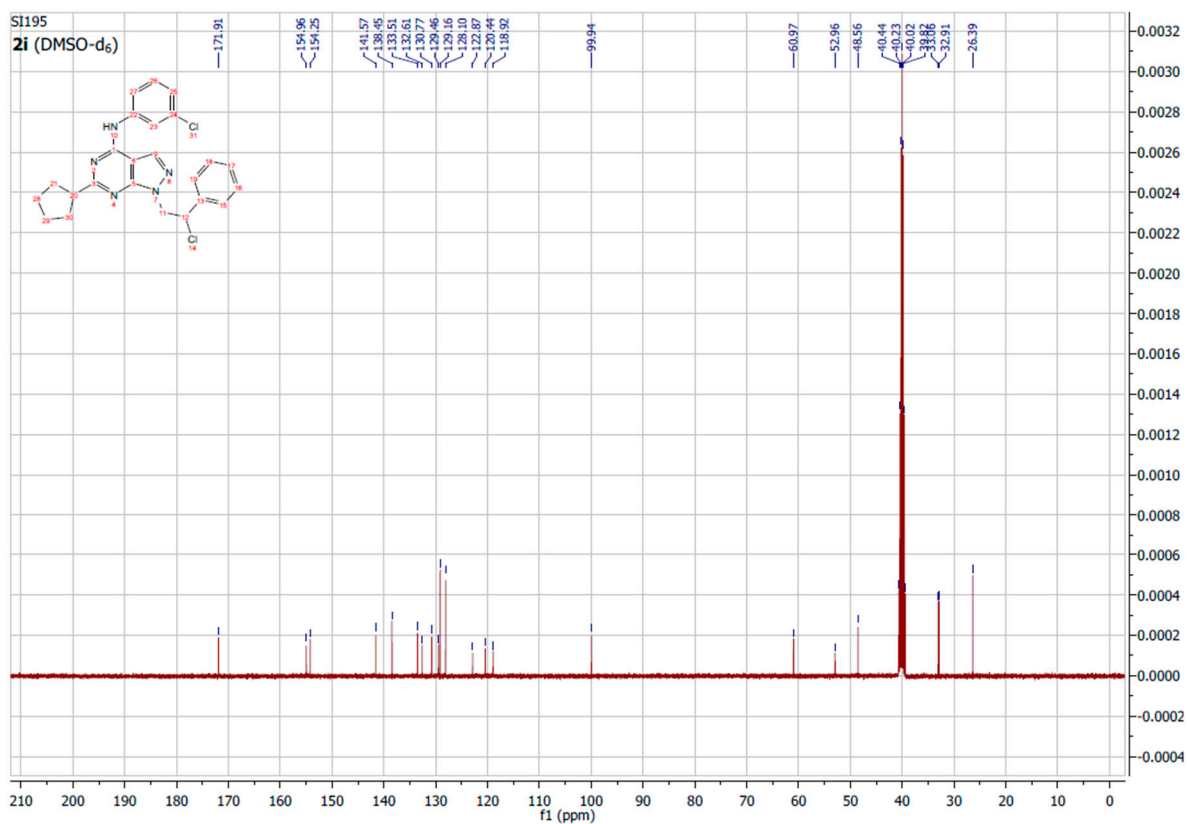

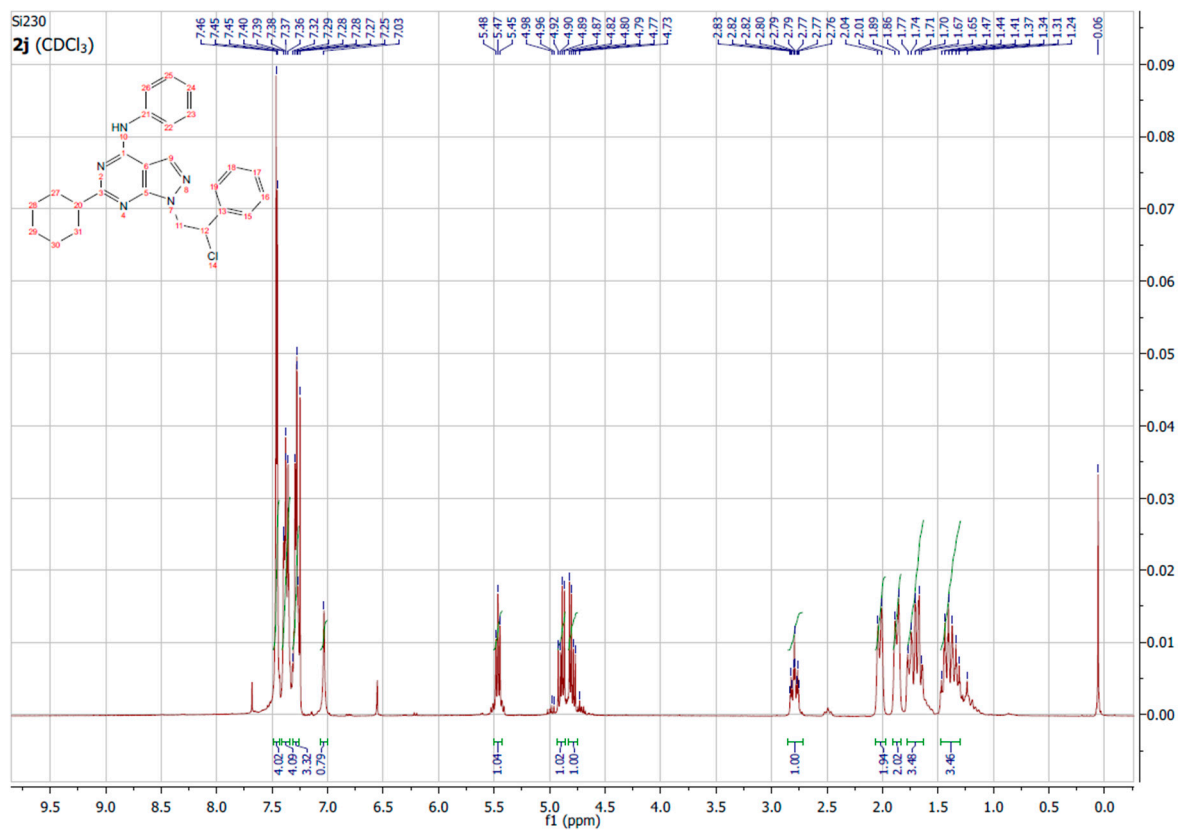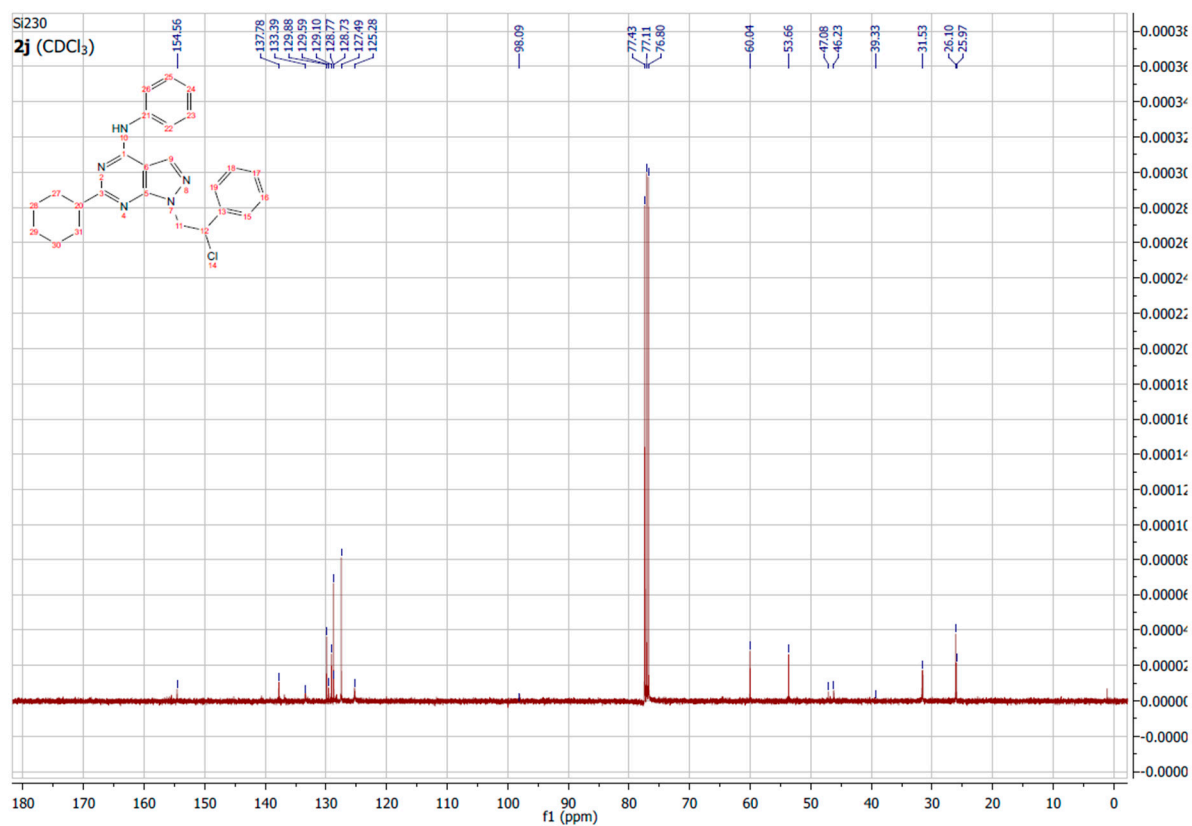

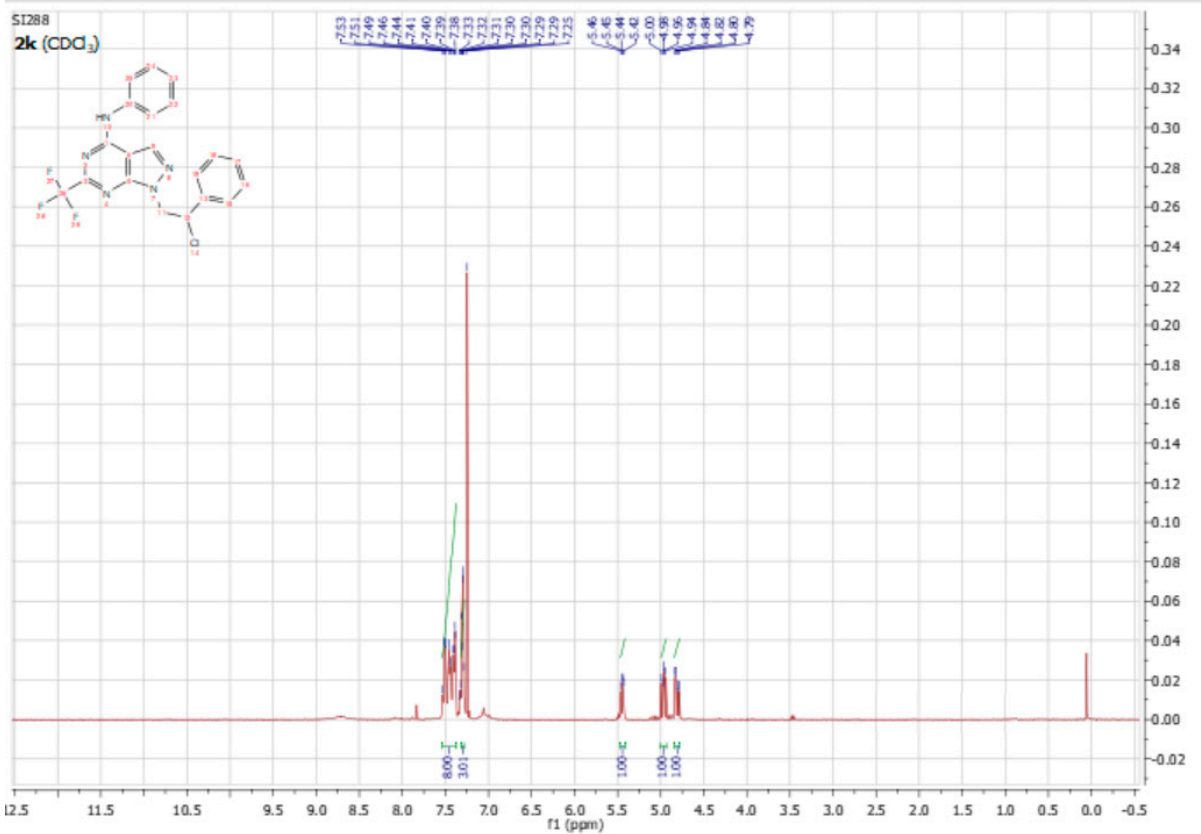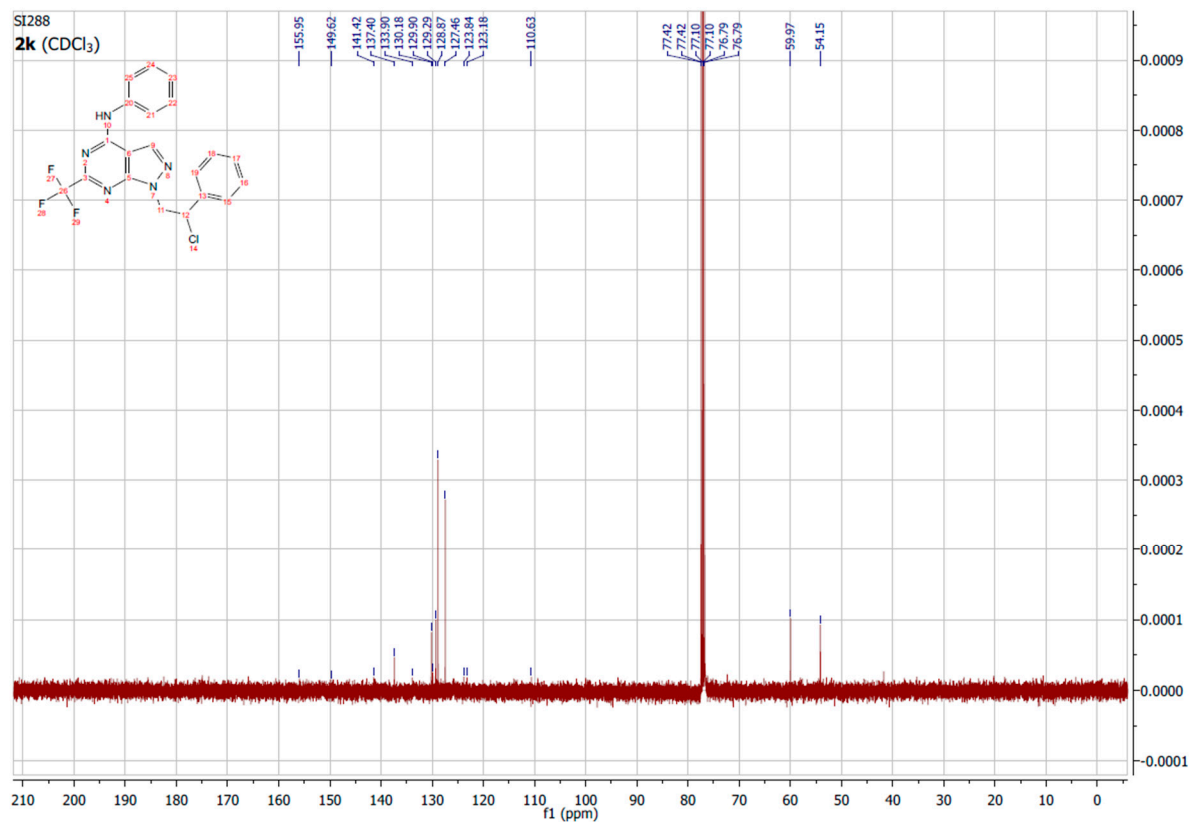

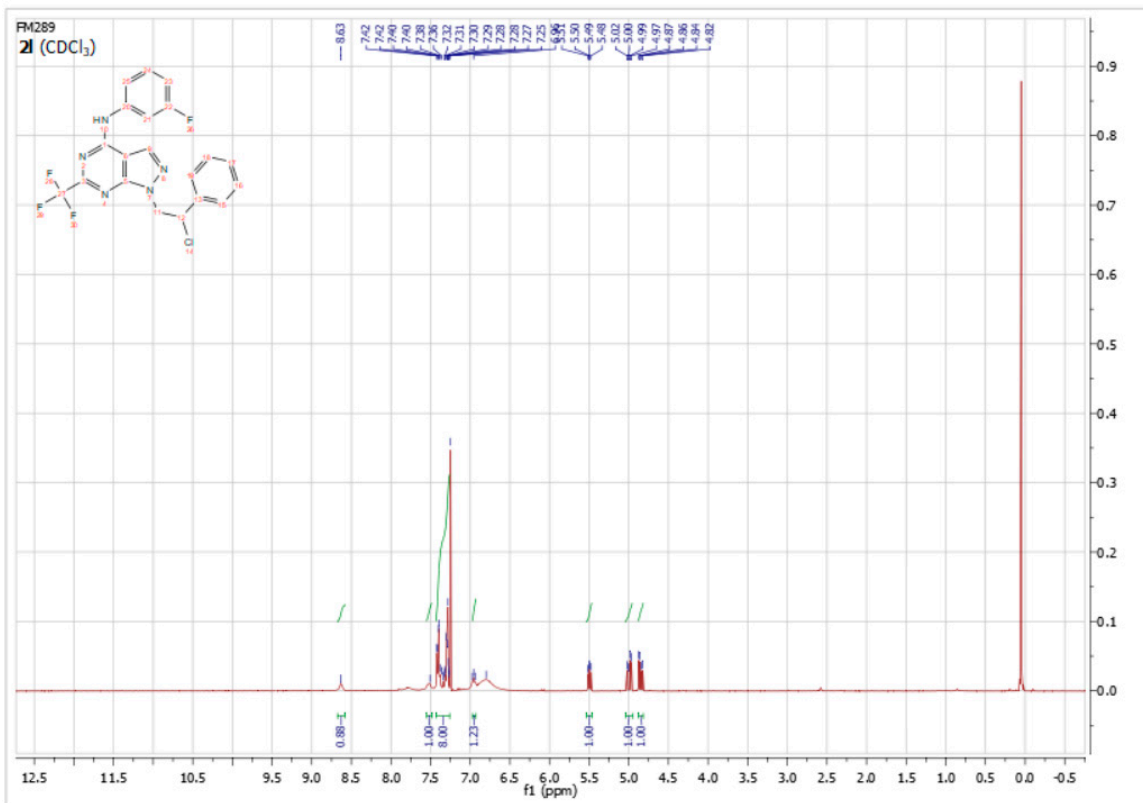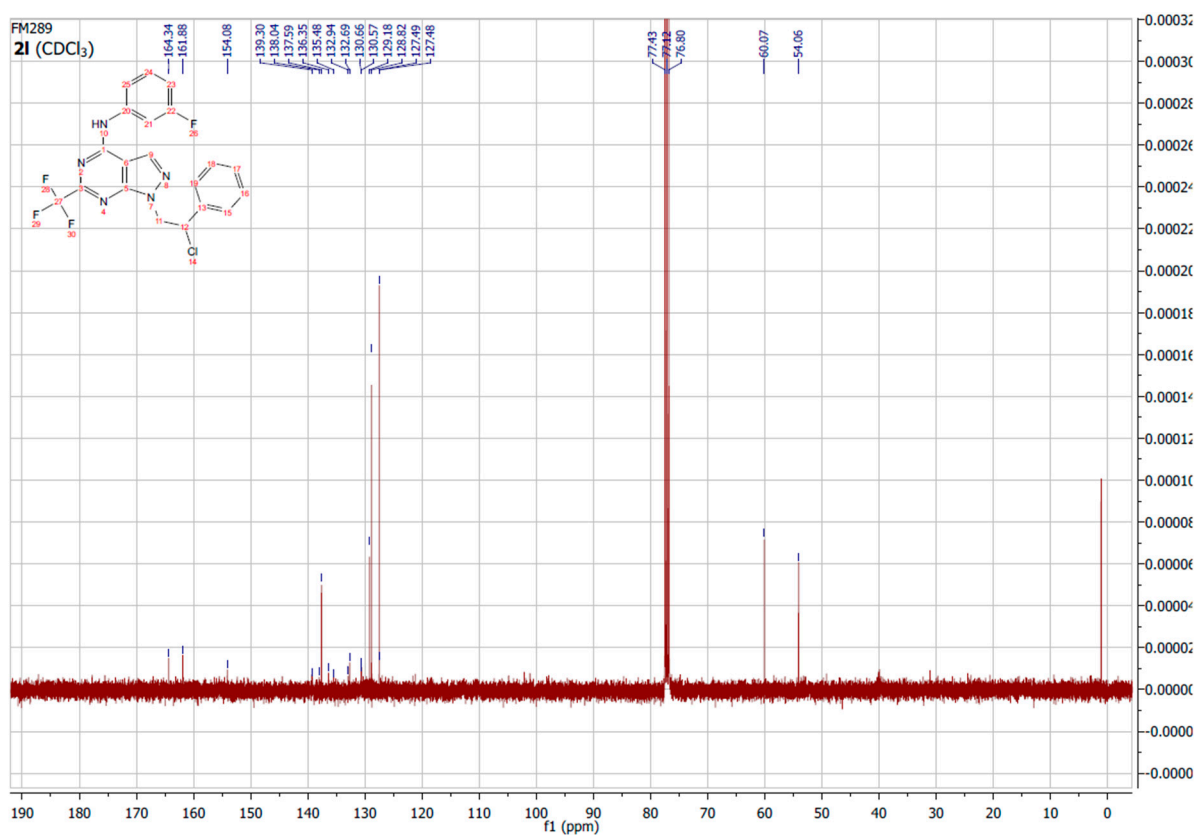

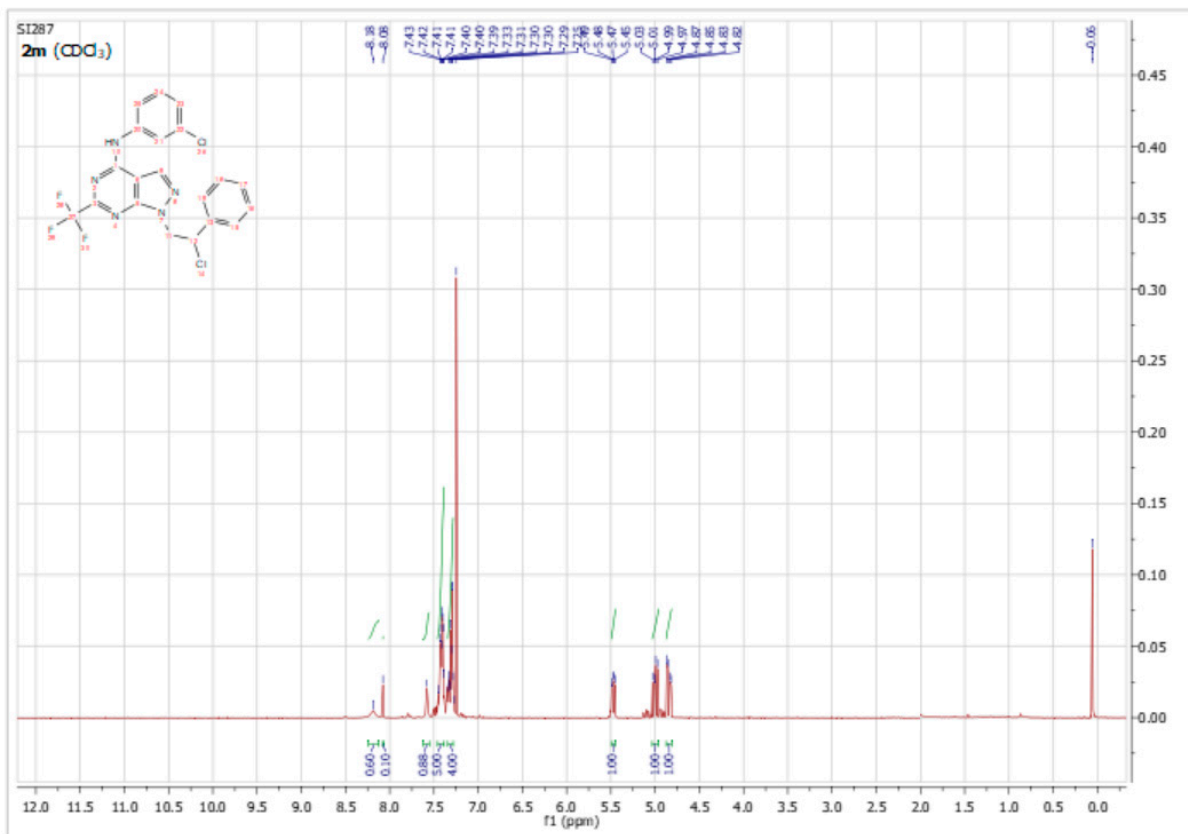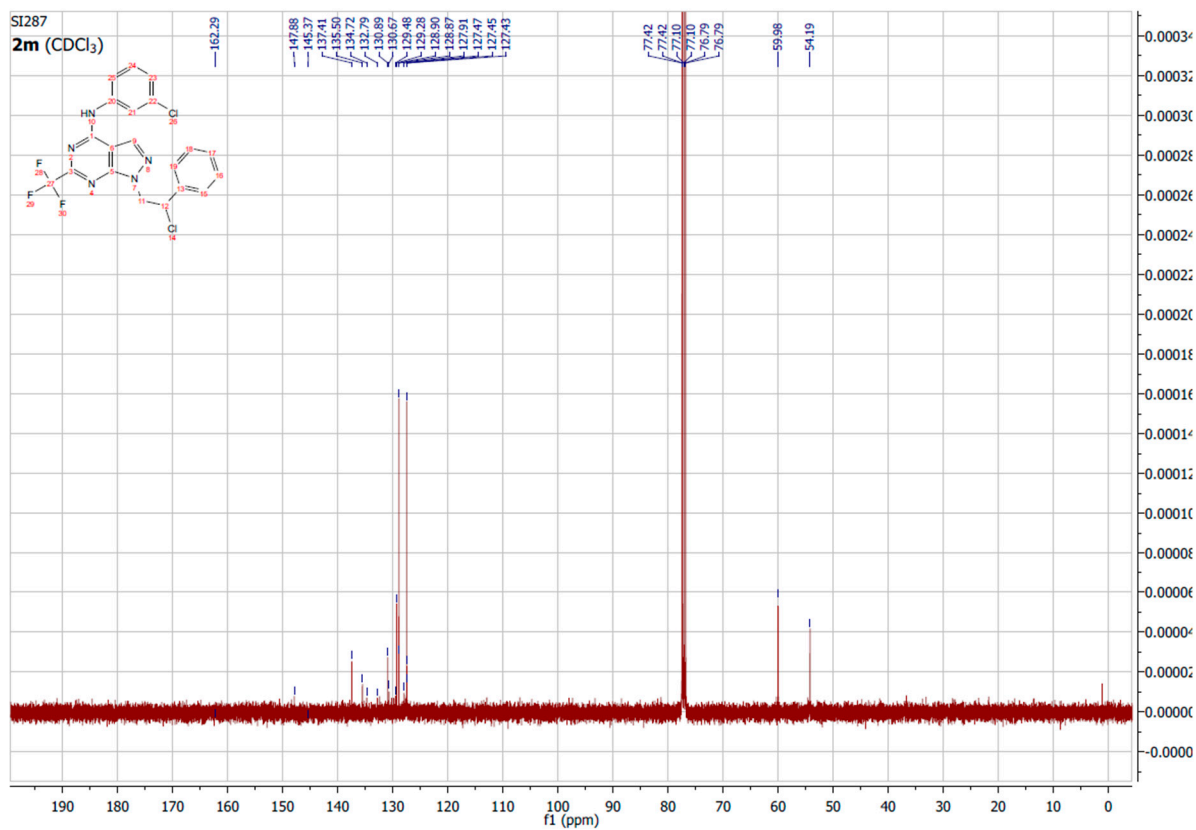

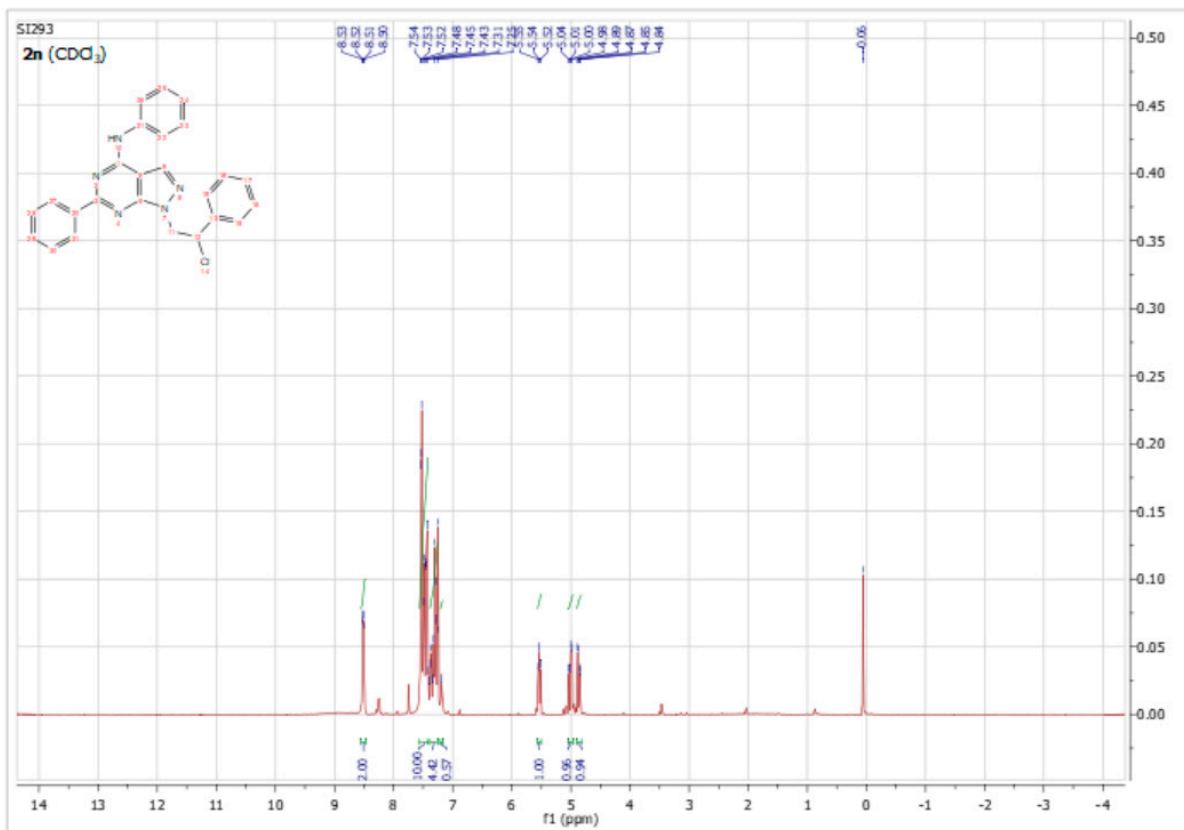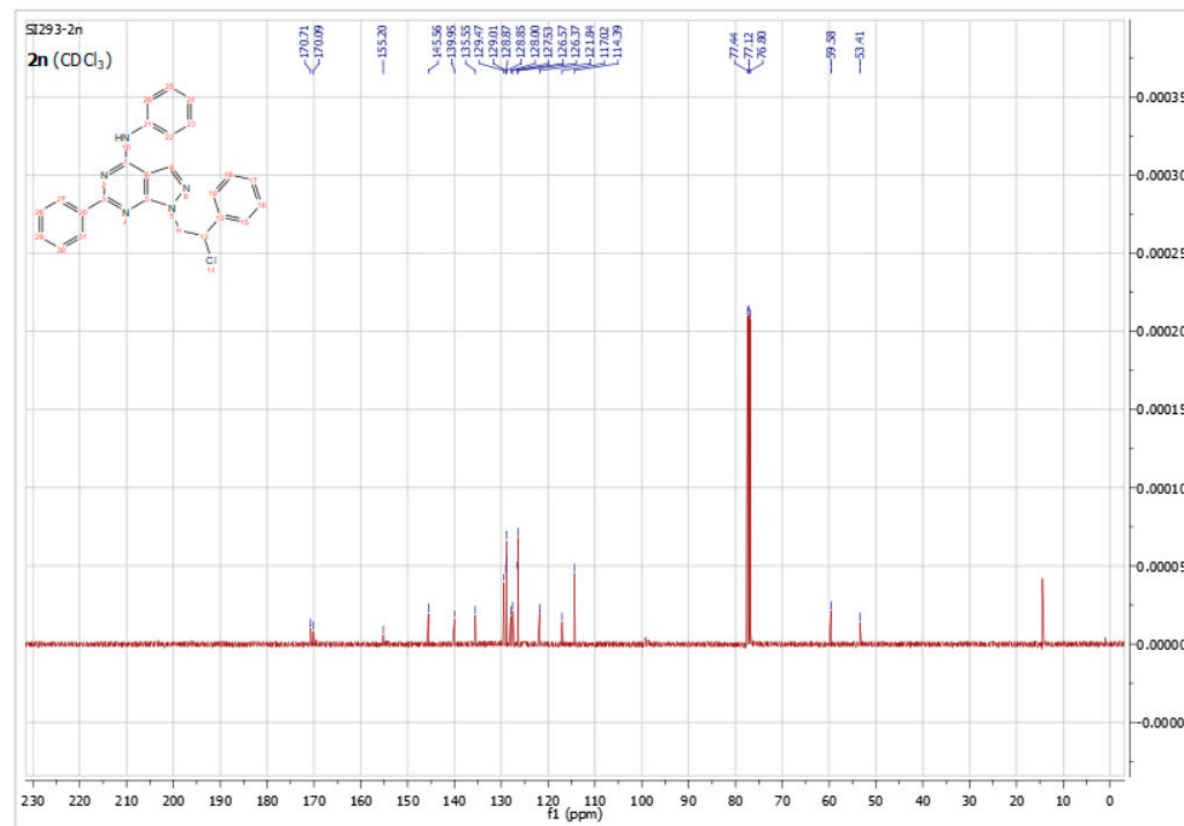



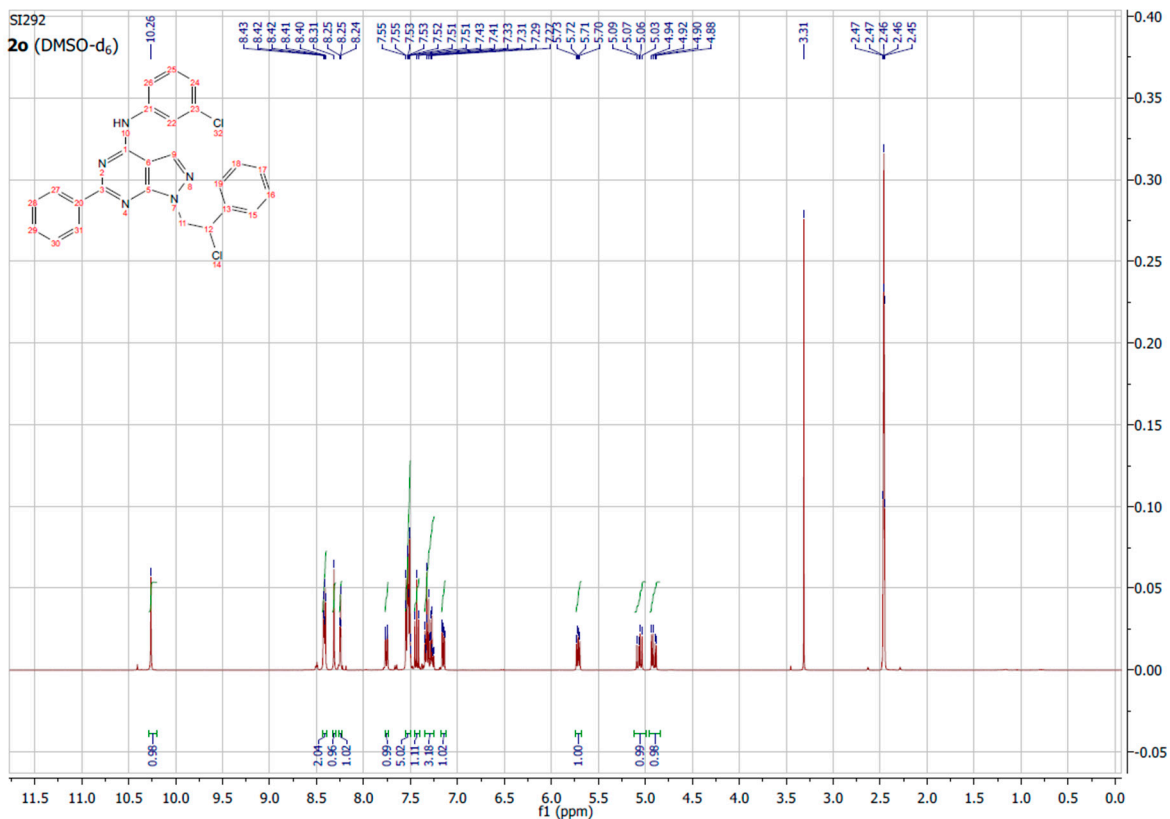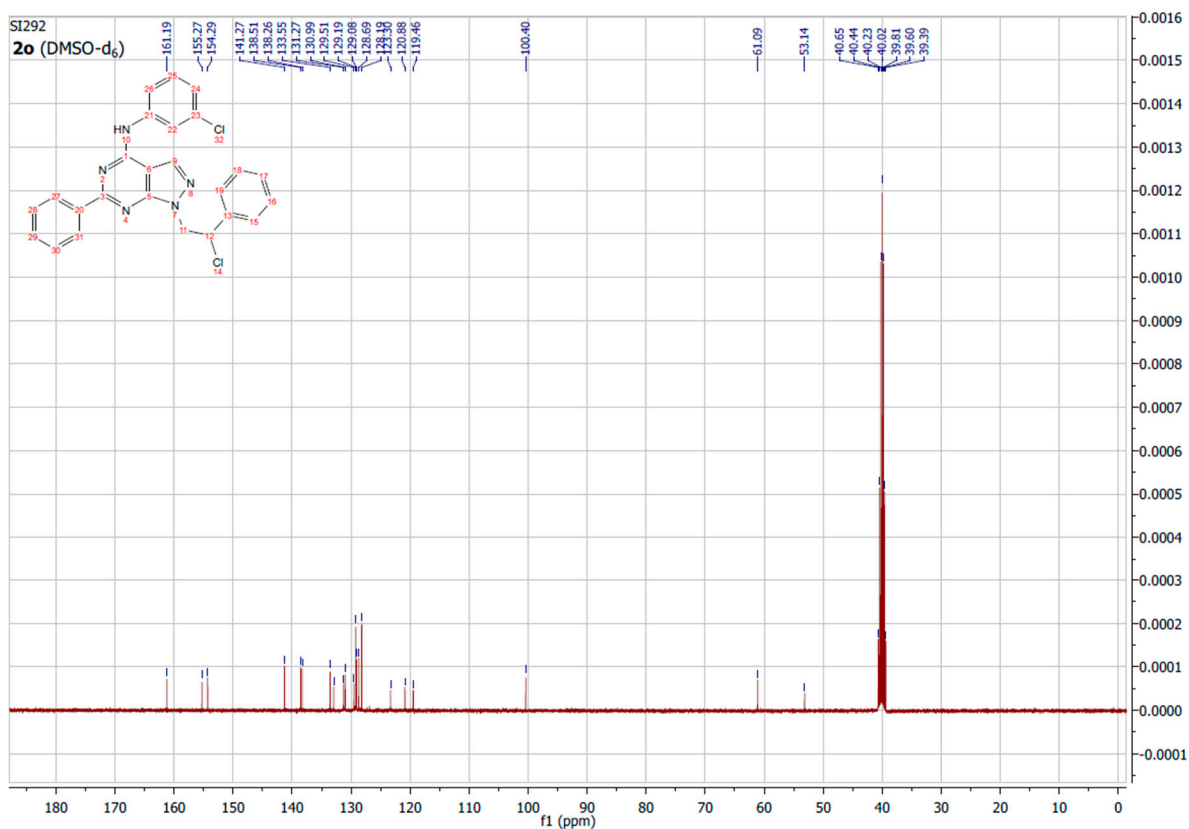

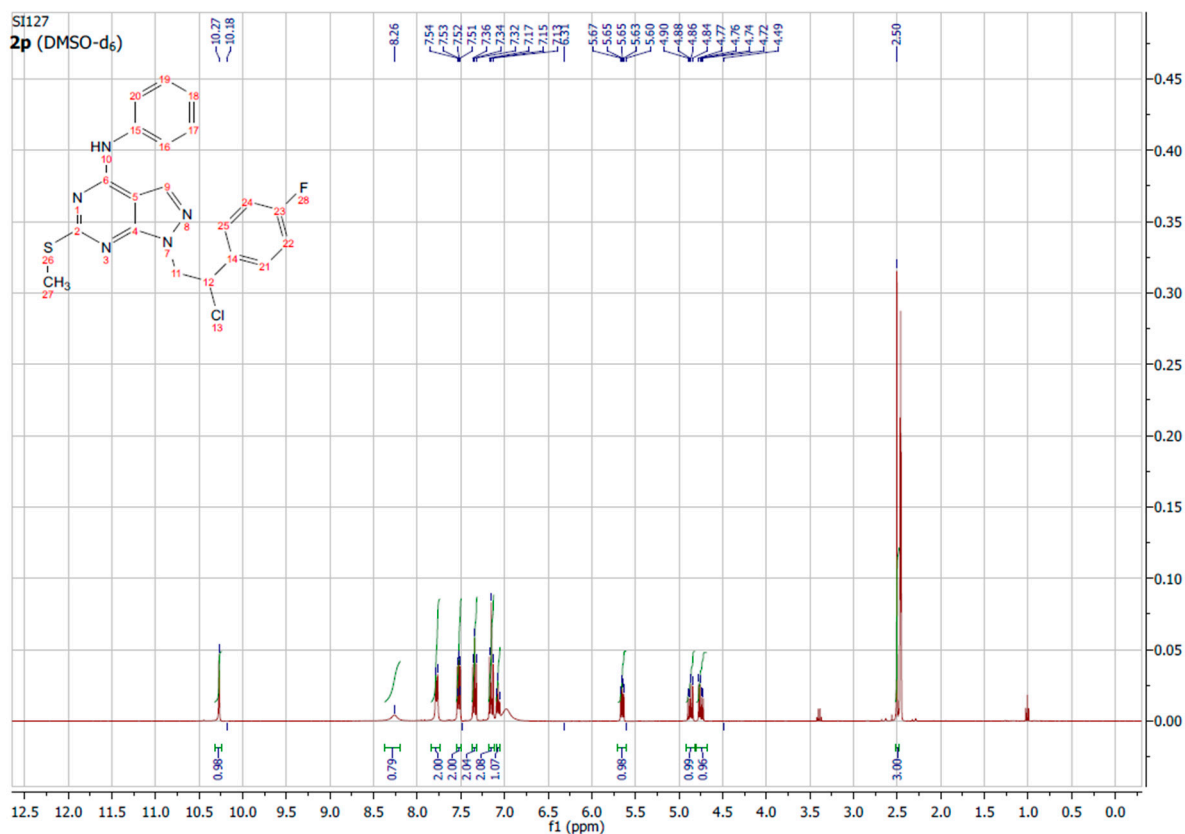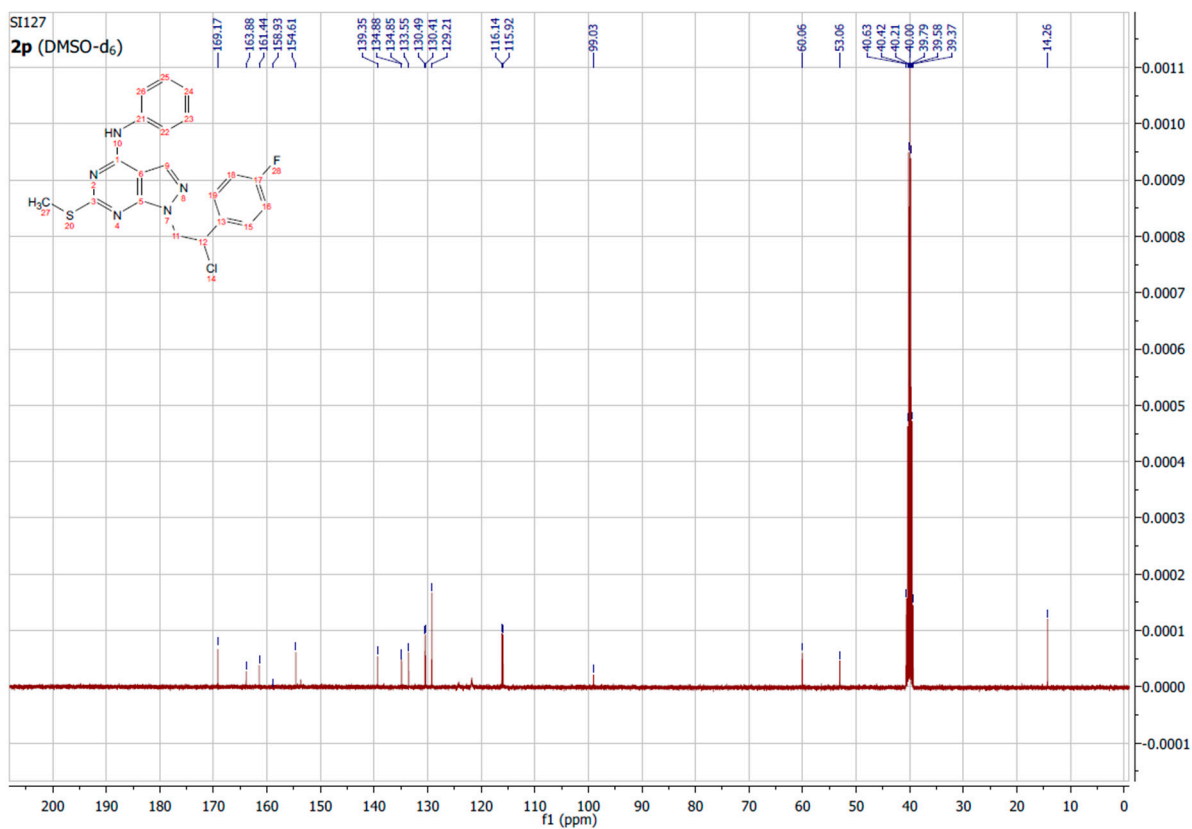

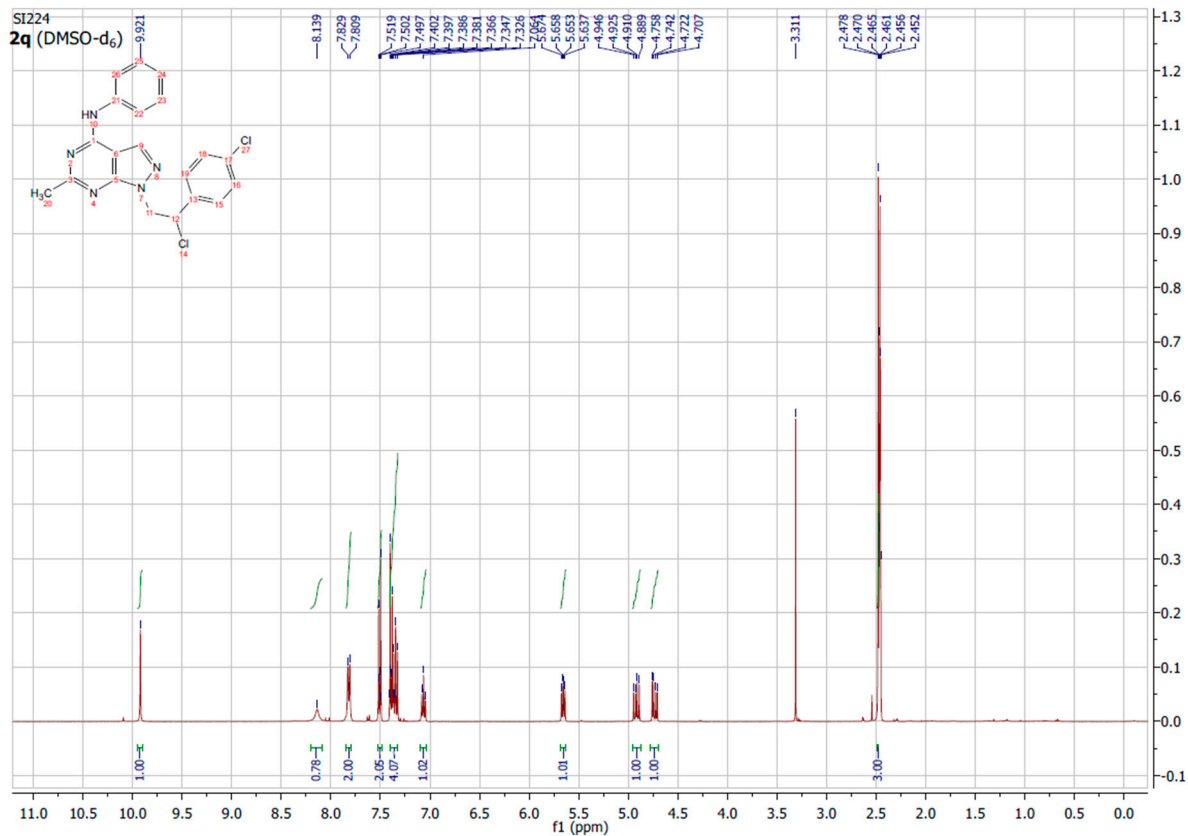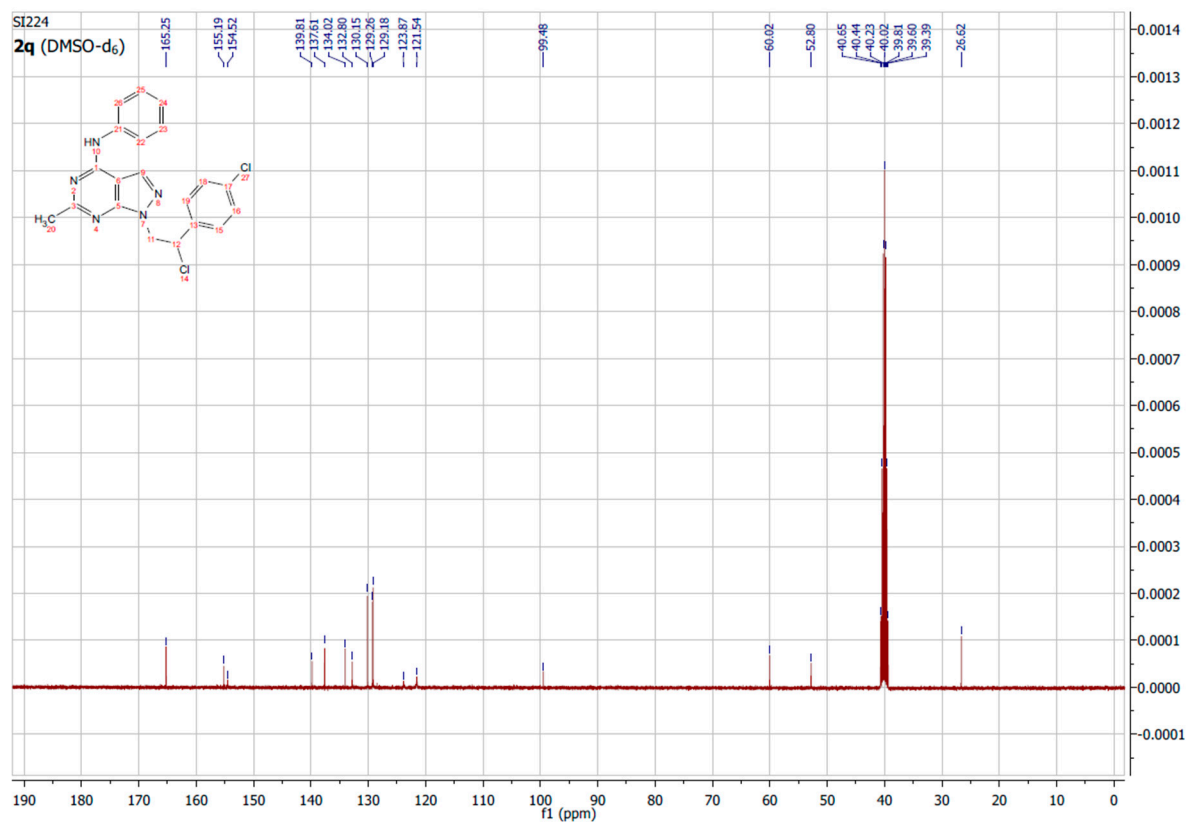

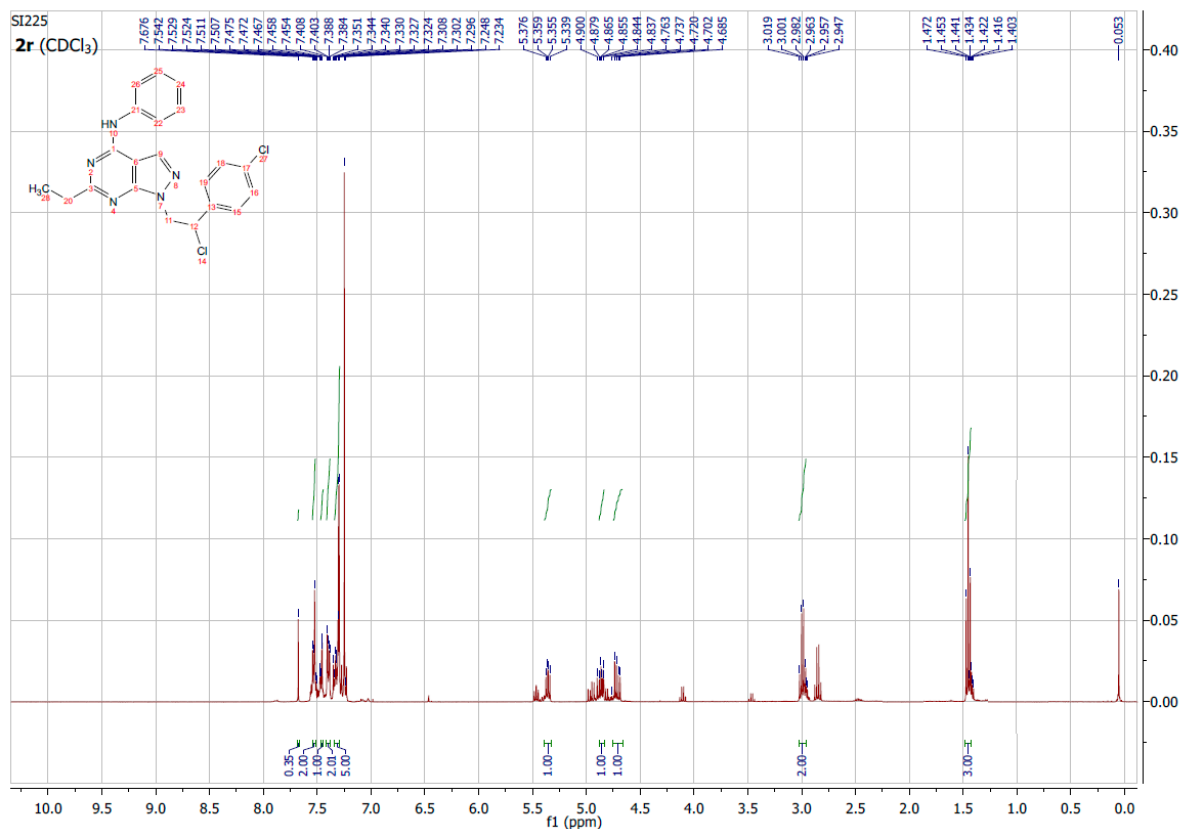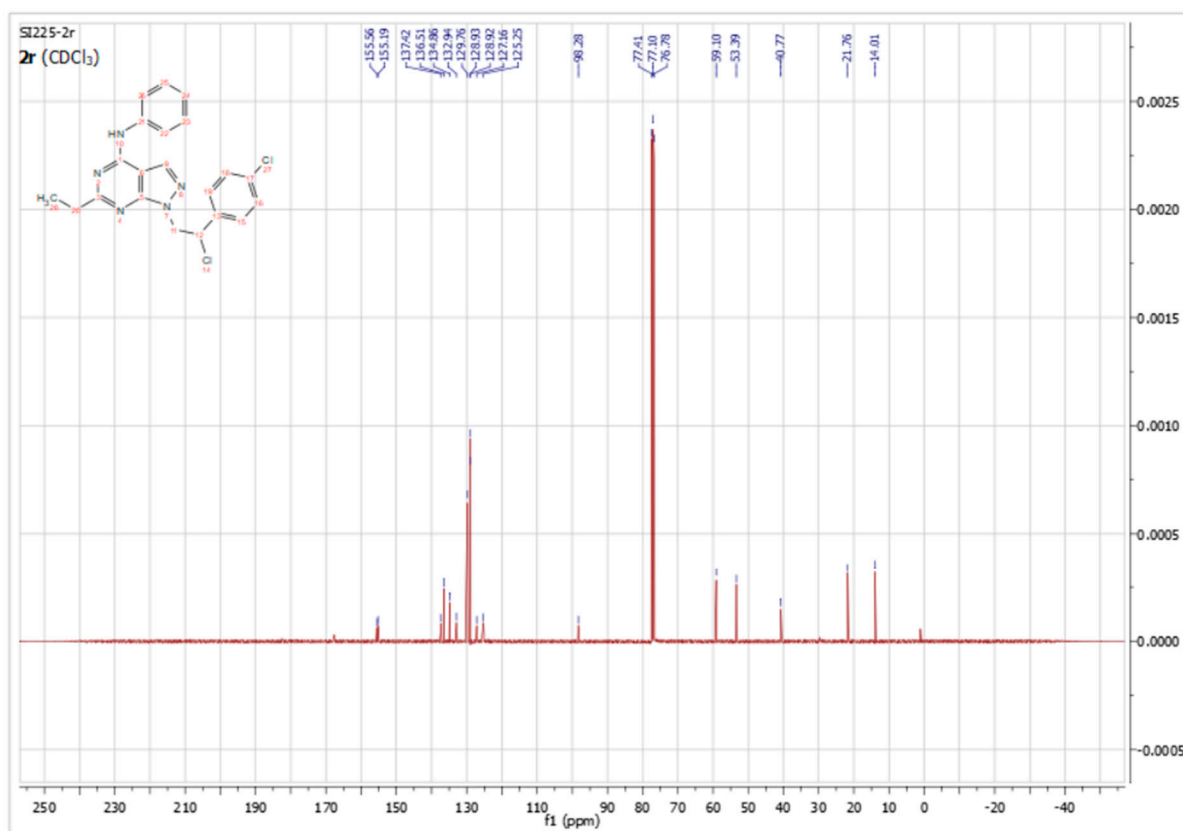

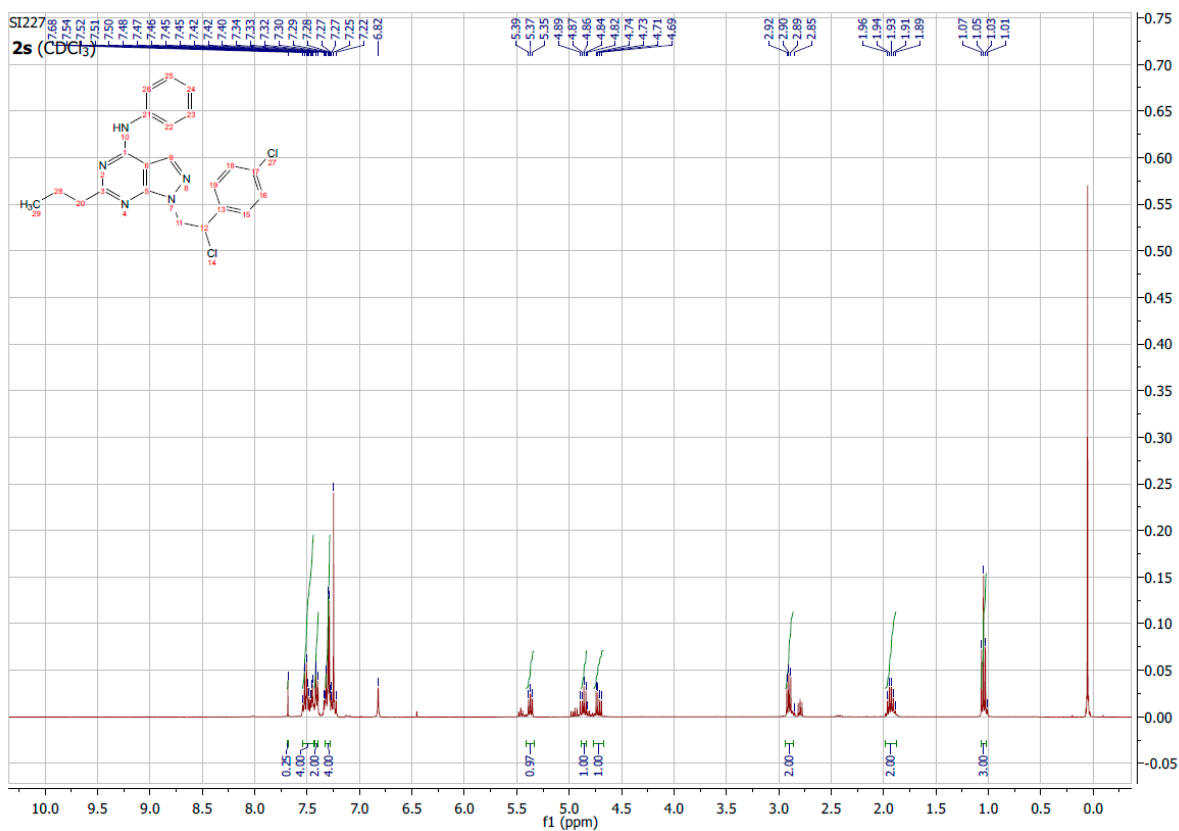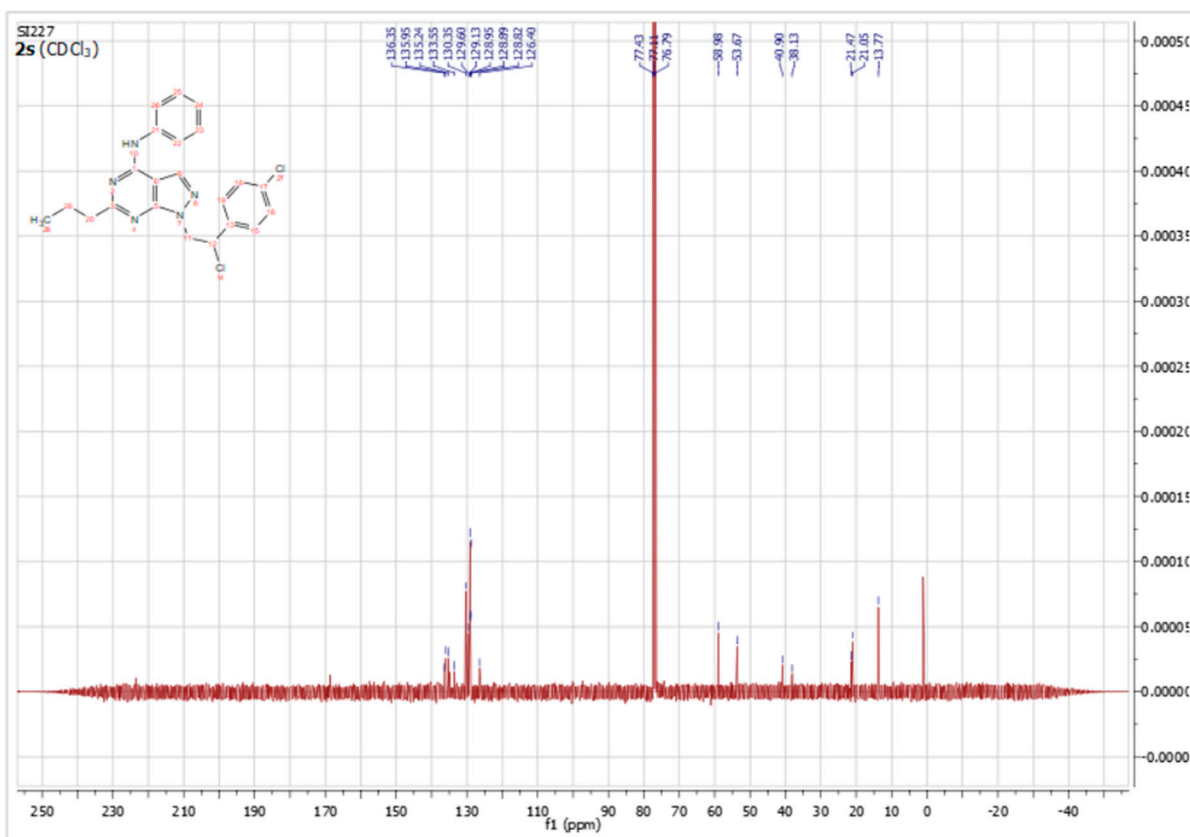

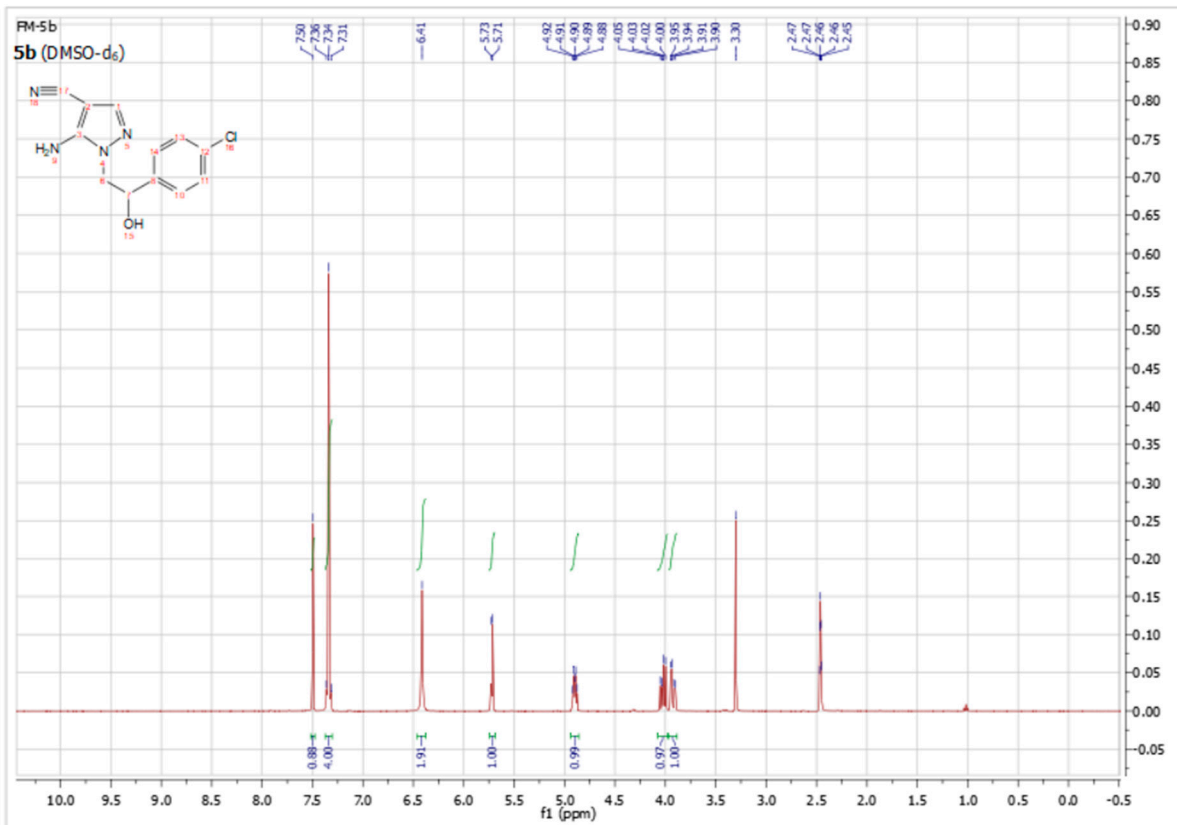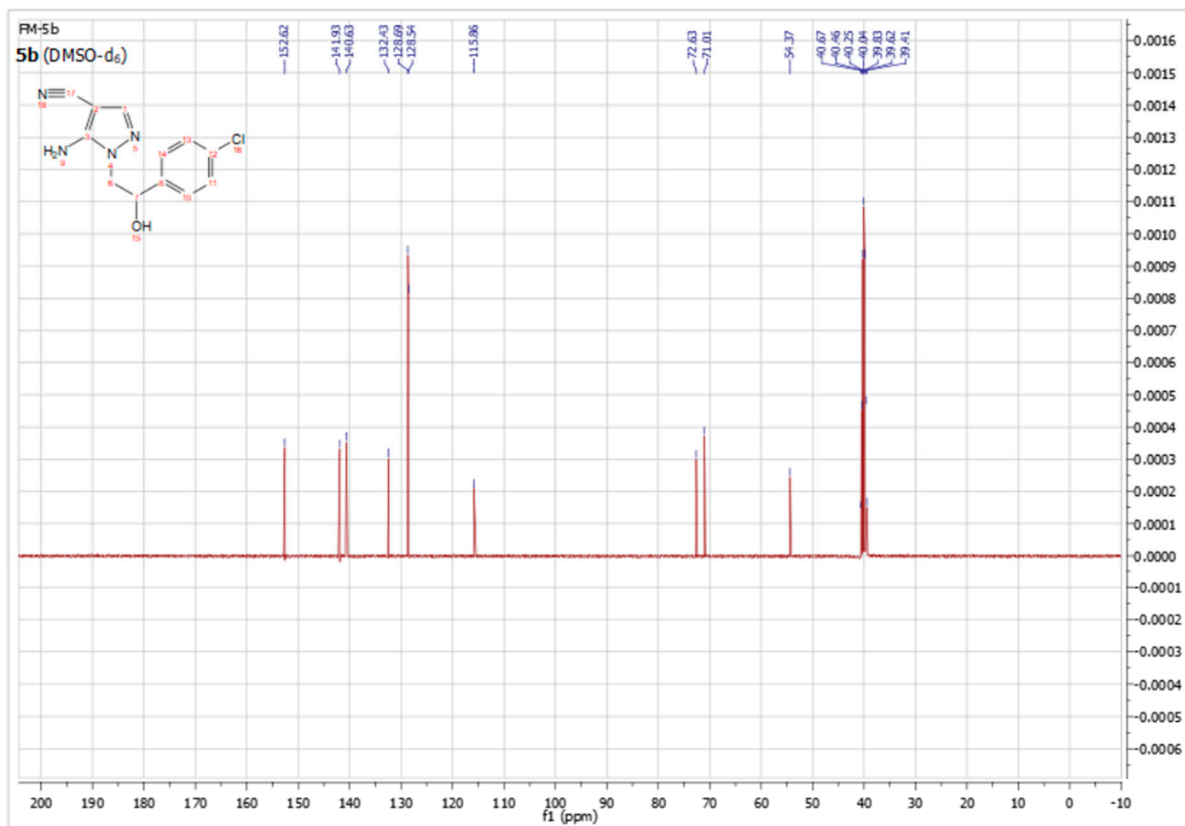

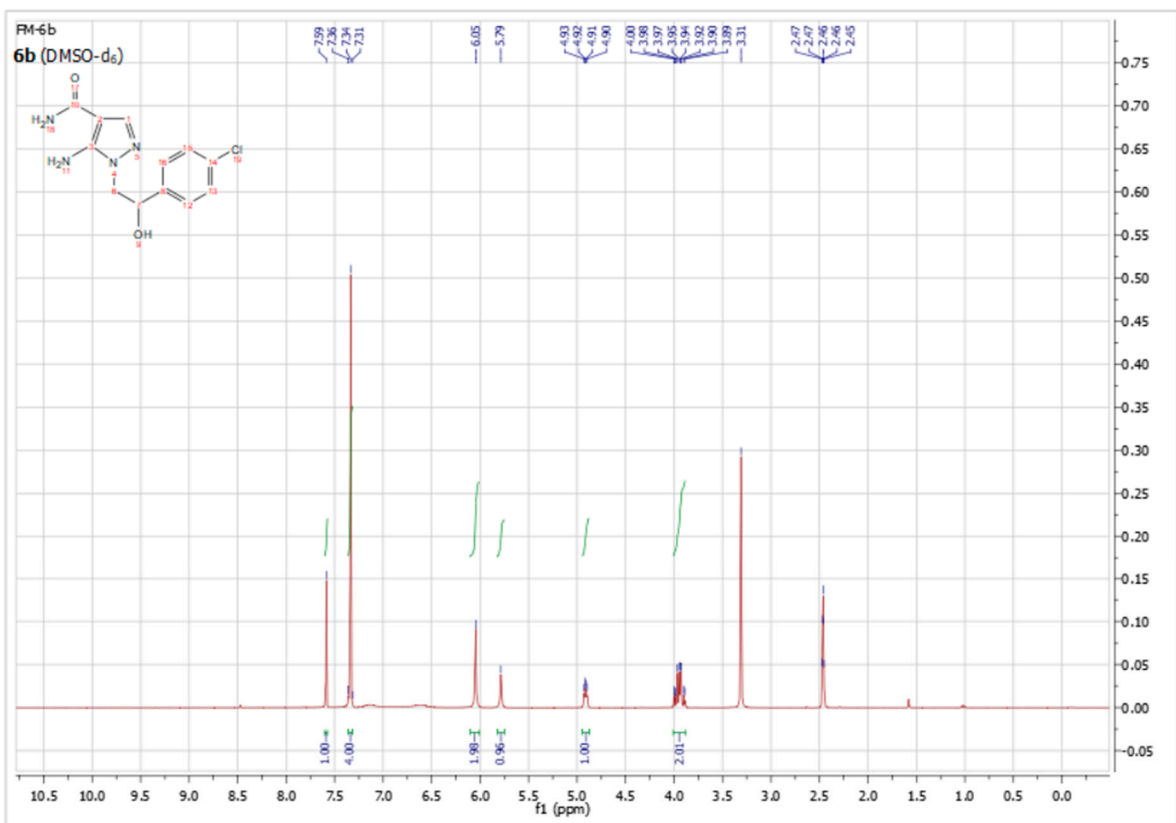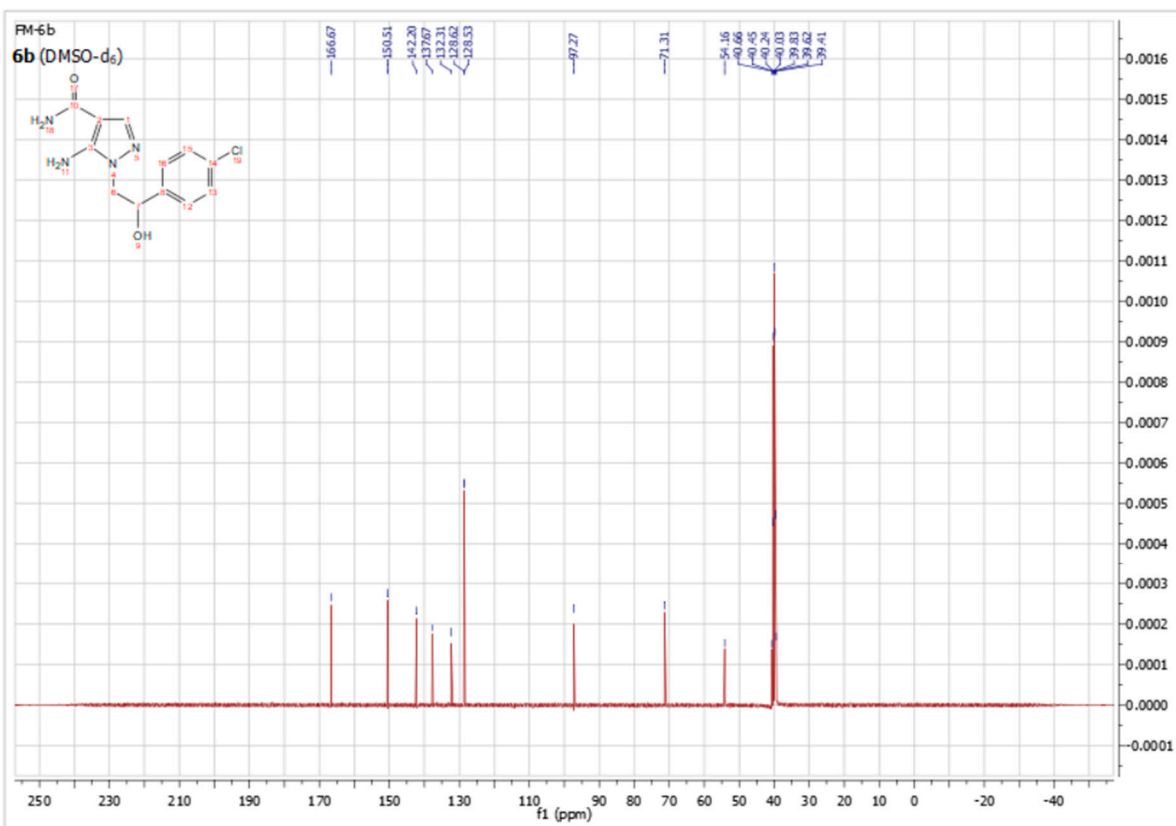

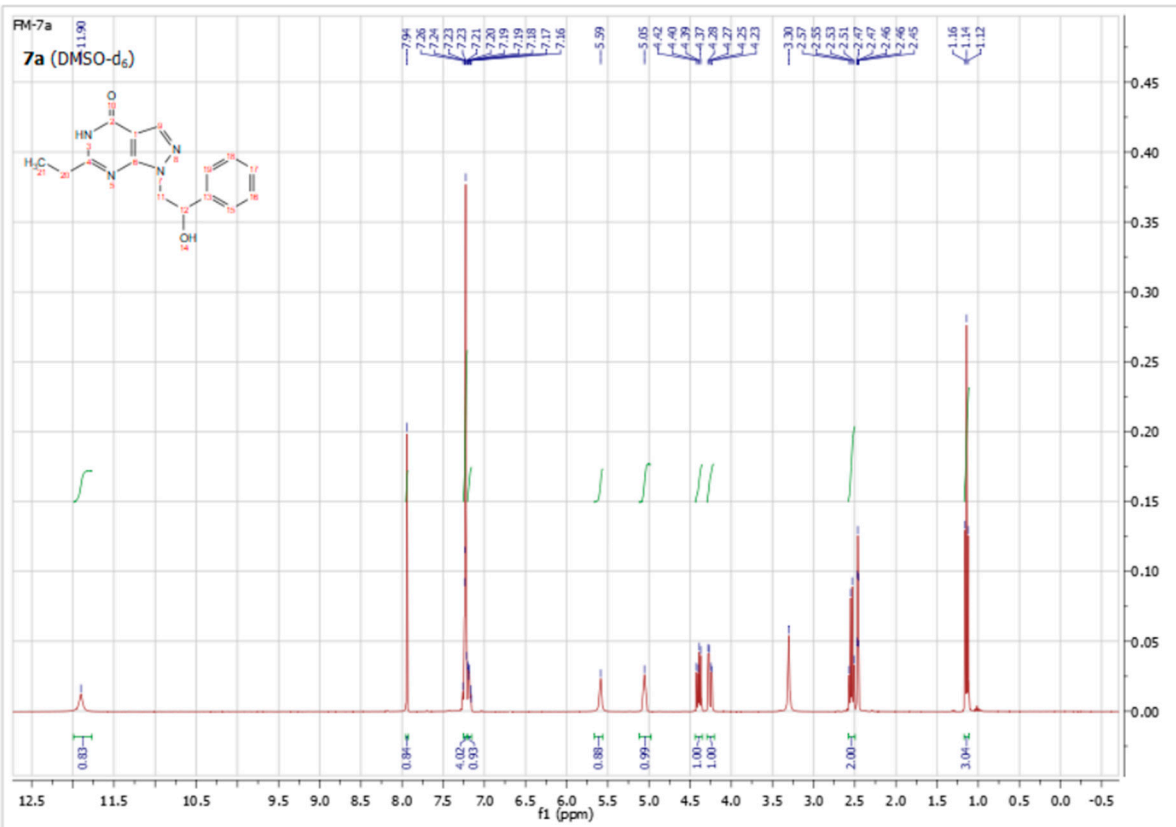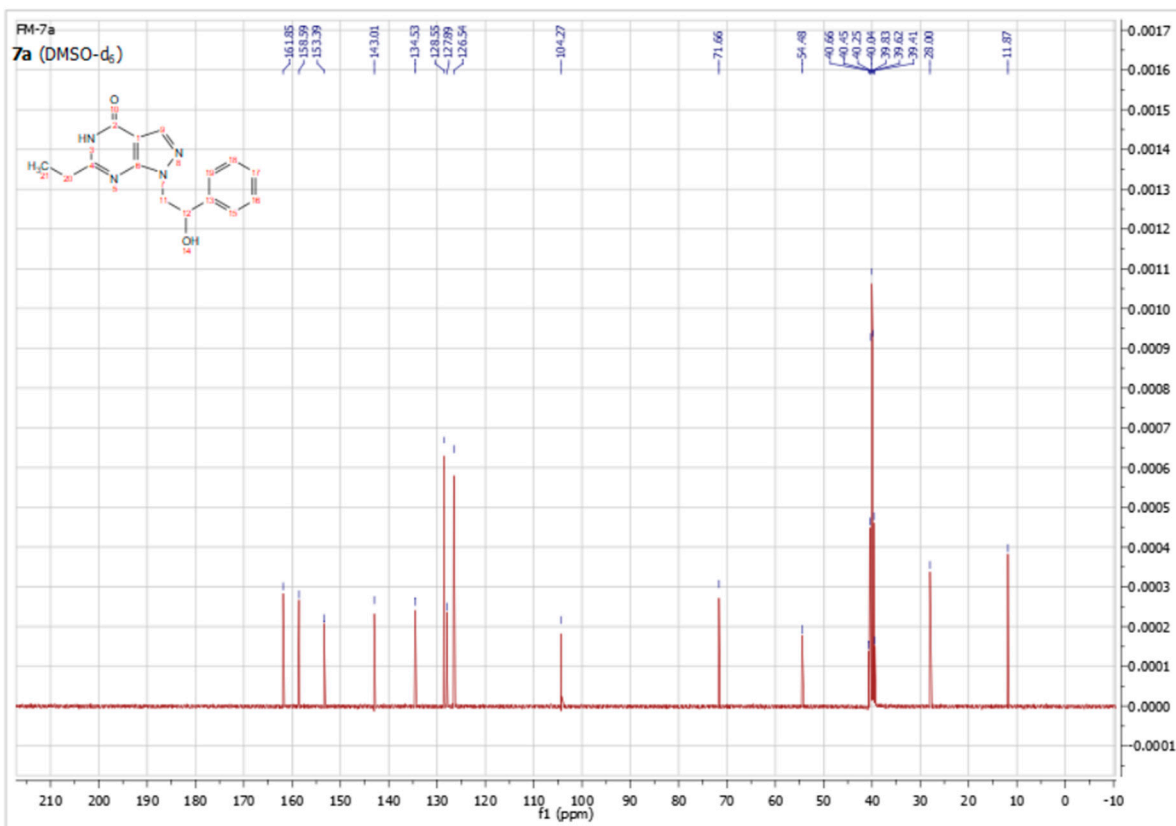



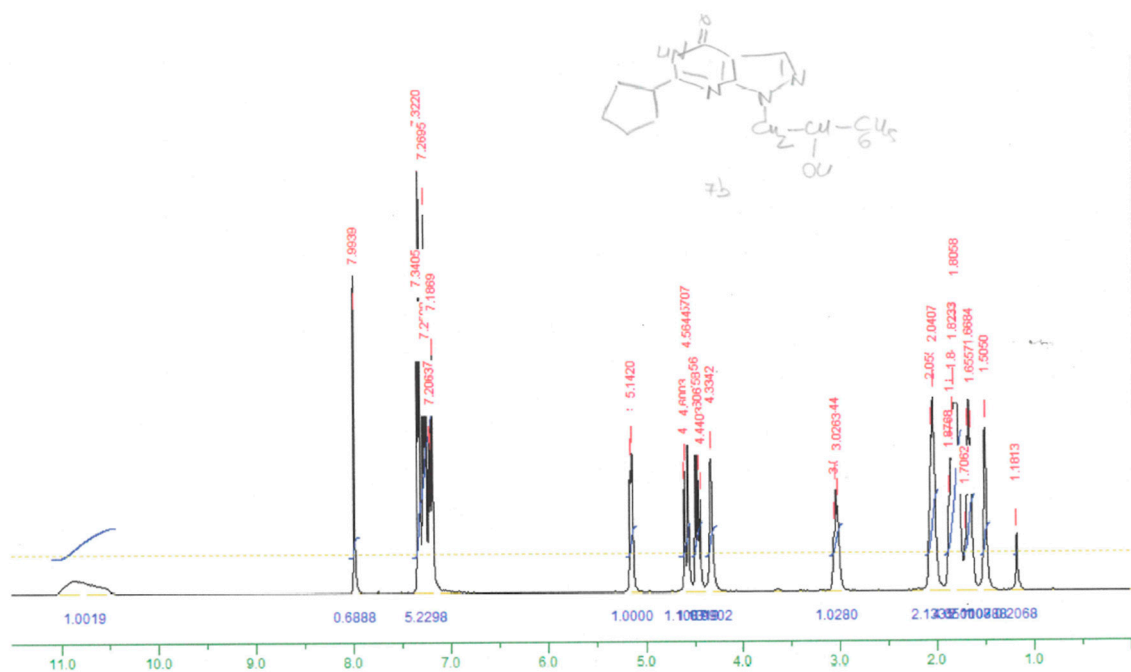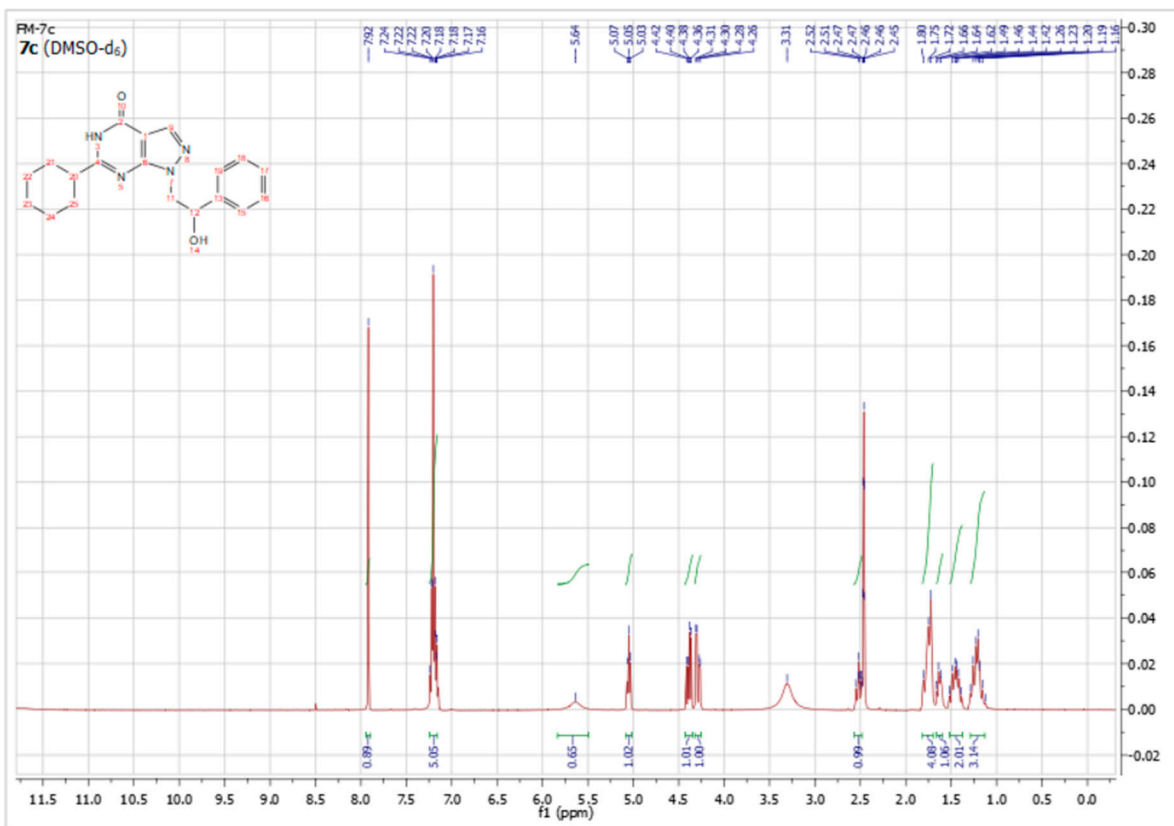

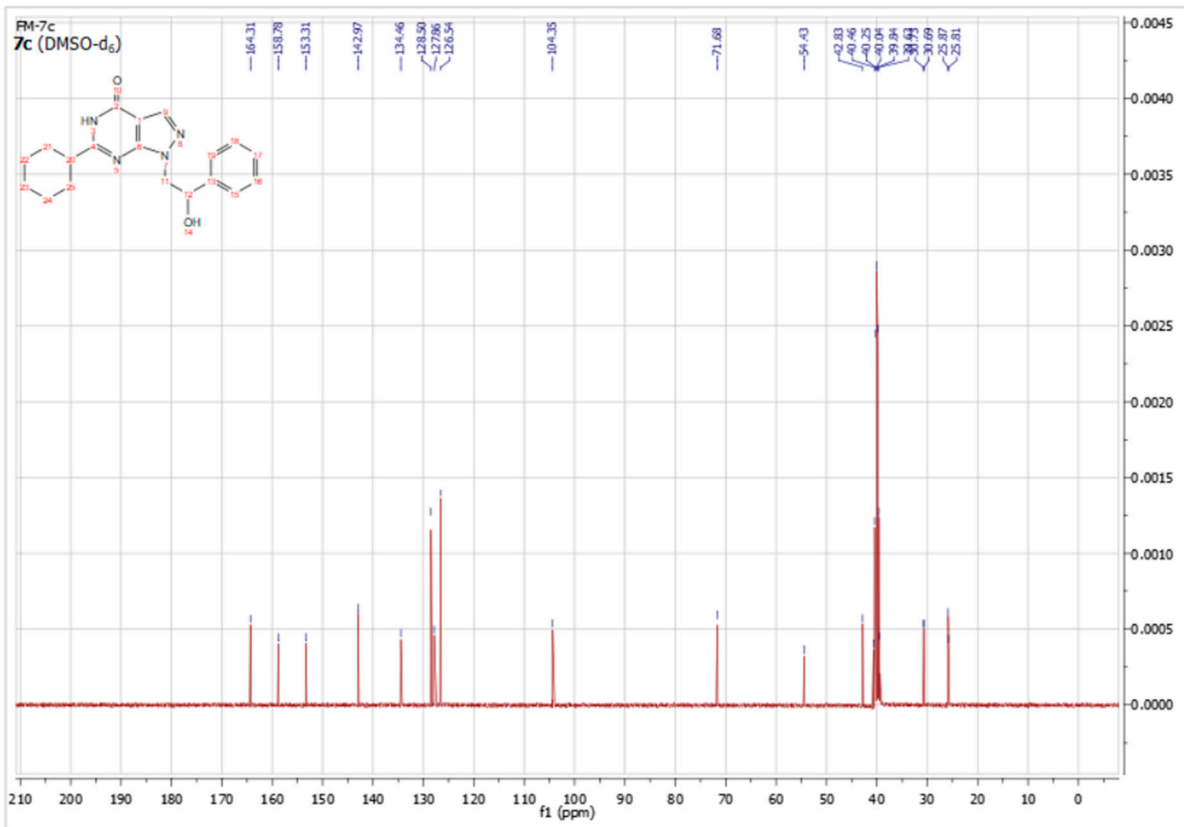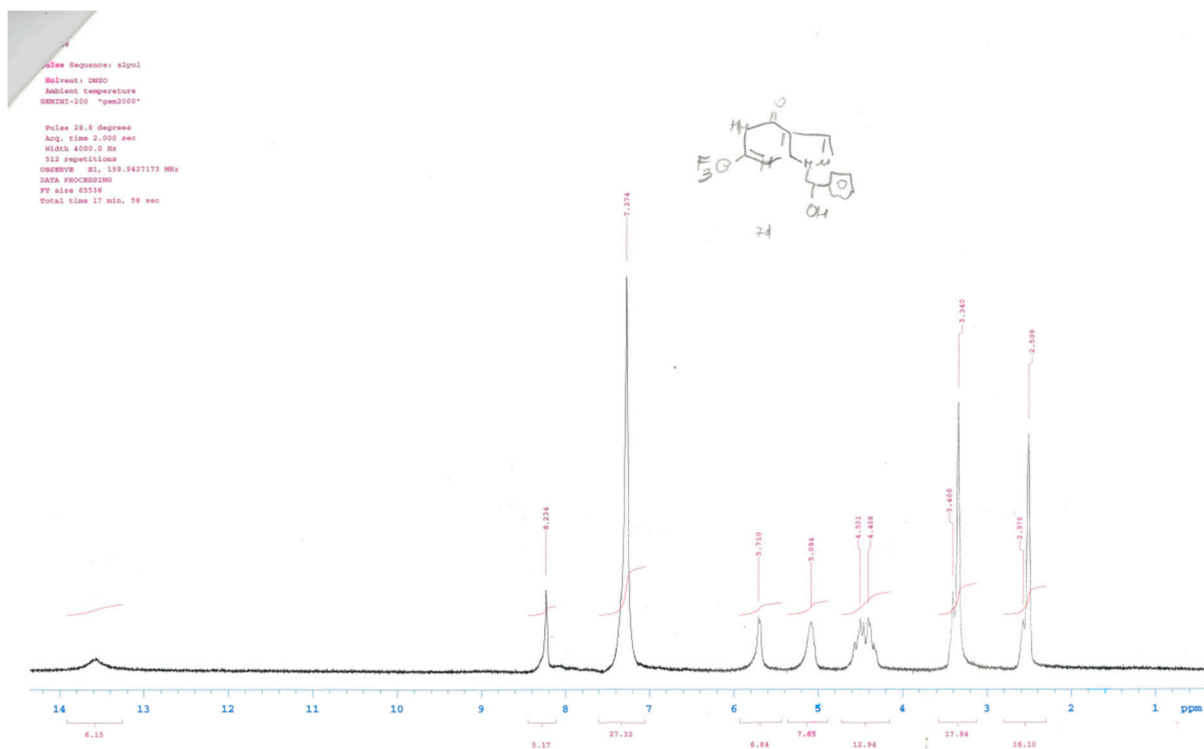

ciclo-6Ar

Pulse Sequence: s2pul

Solvent: DMSO

Ambient temperature

GEMINI-200 "gem2000"

Pulse 28.8 degrees

Acq. time 2.000 sec

Width 4000.0 Hz

512 repetitions

OBSERVE H1, 199.9427173 MHz

DATA PROCESSING

FT size 65536

Total time 17 min, 58 sec

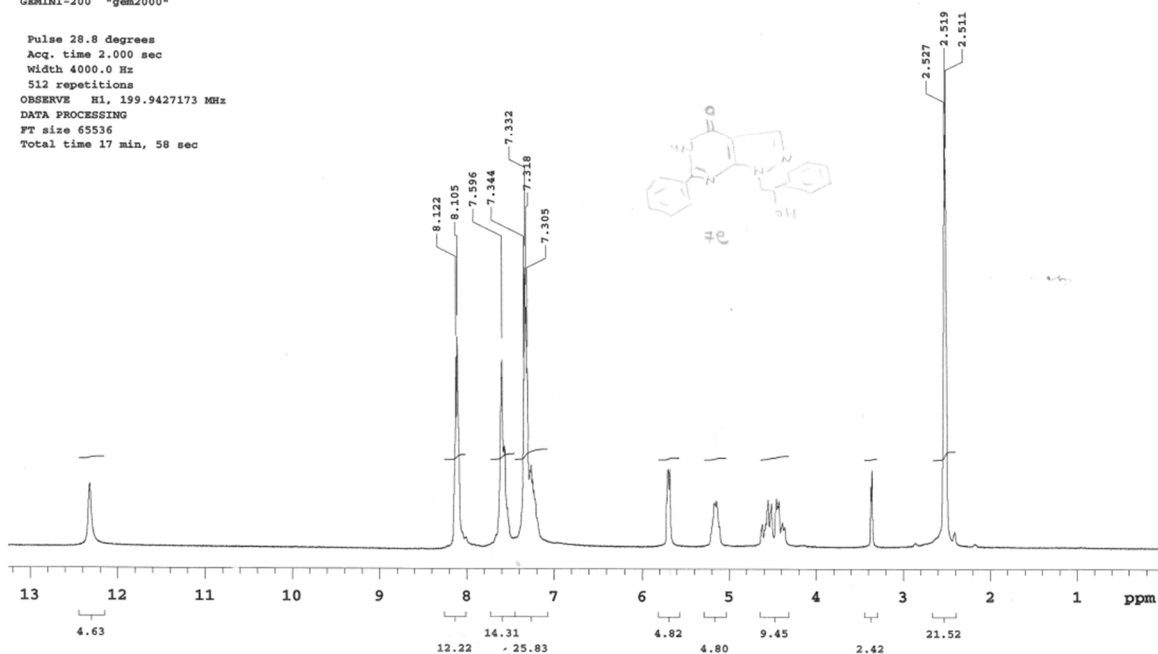

pCl6Meciclo

Pulse Sequence: s2pul

Solvent: DMSO

Ambient temperature

GEMINI-200 "gem2000"

Pulse 28.8 degrees

Acq. time 2.000 sec

Width 4000.0 Hz

272 repetitions

OBSERVE H1, 199.9427173 MHz

DATA PROCESSING

FT size 65536

Total time 17 min, 58 sec

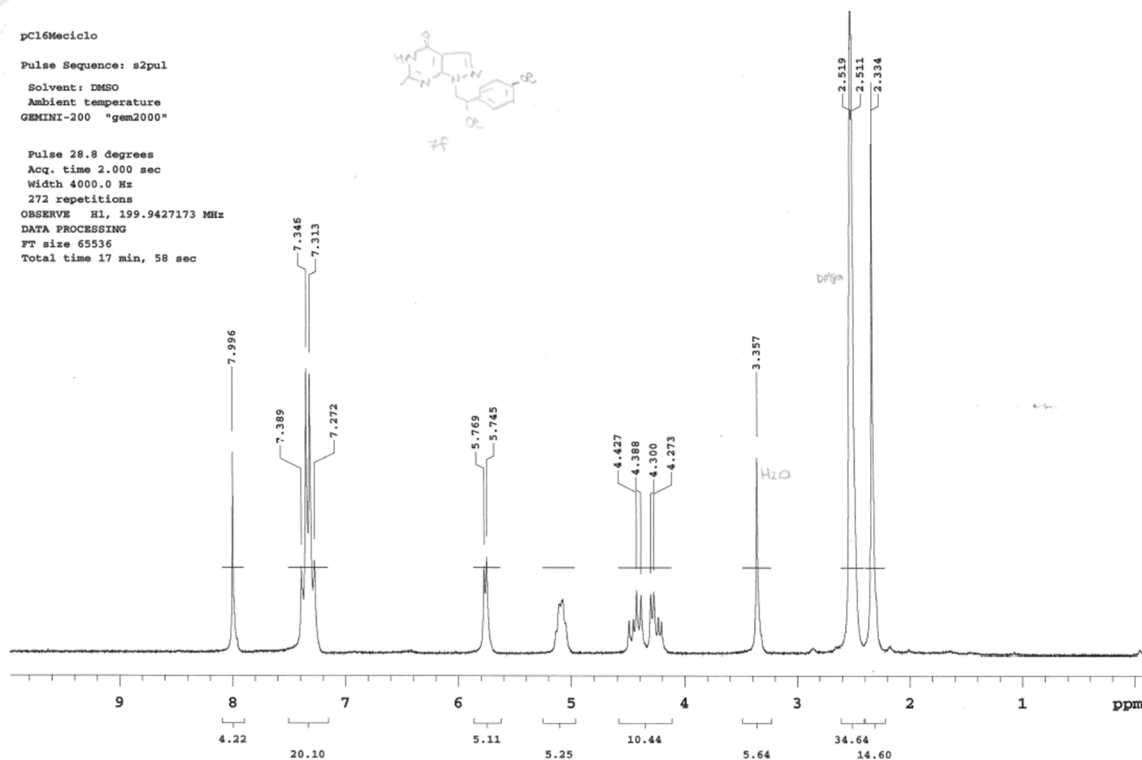

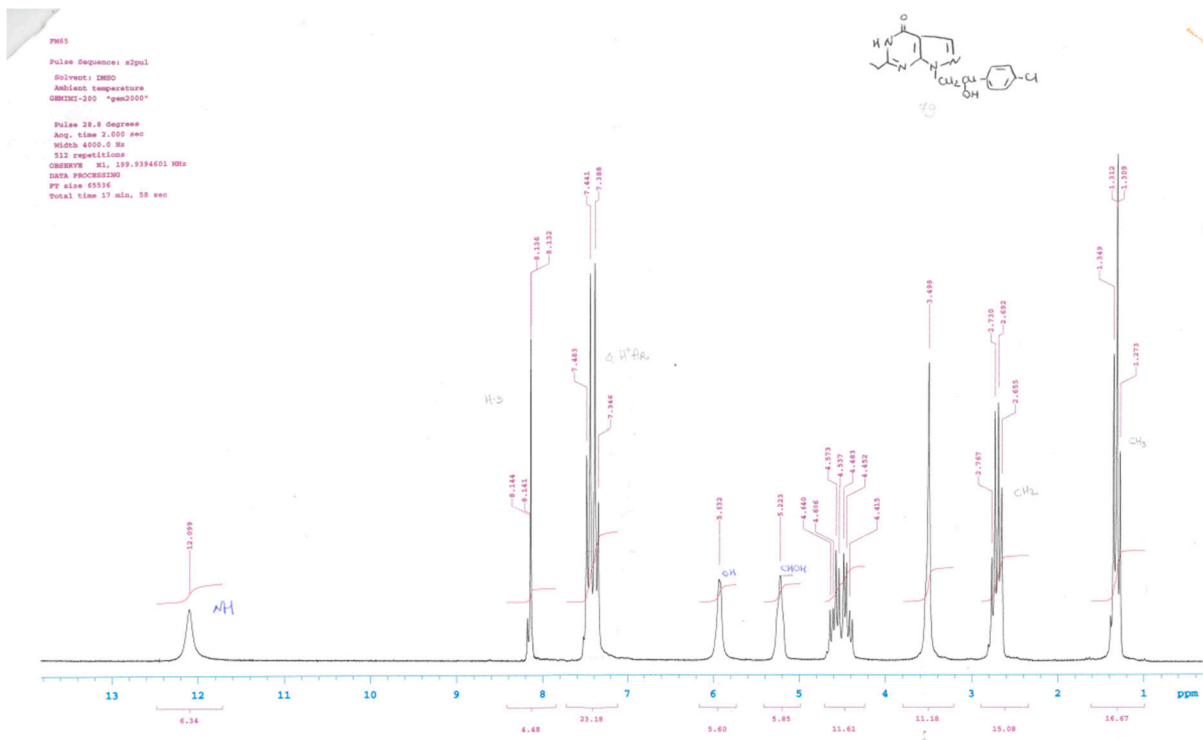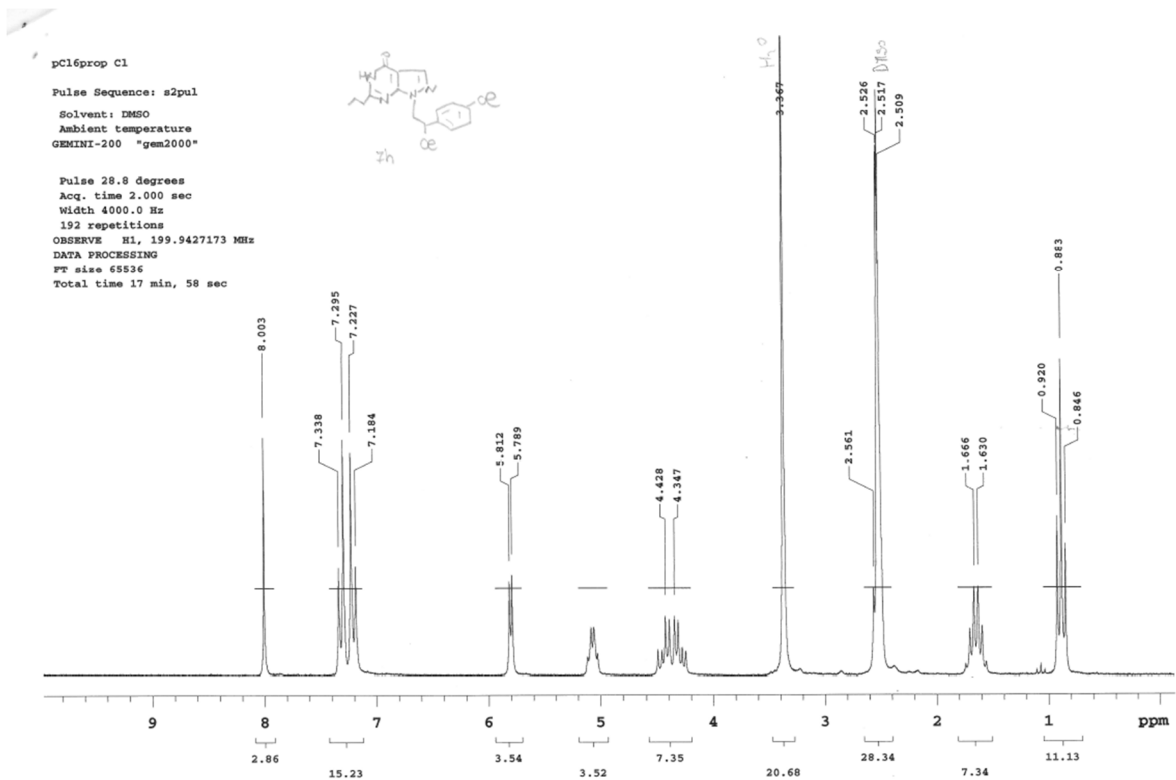

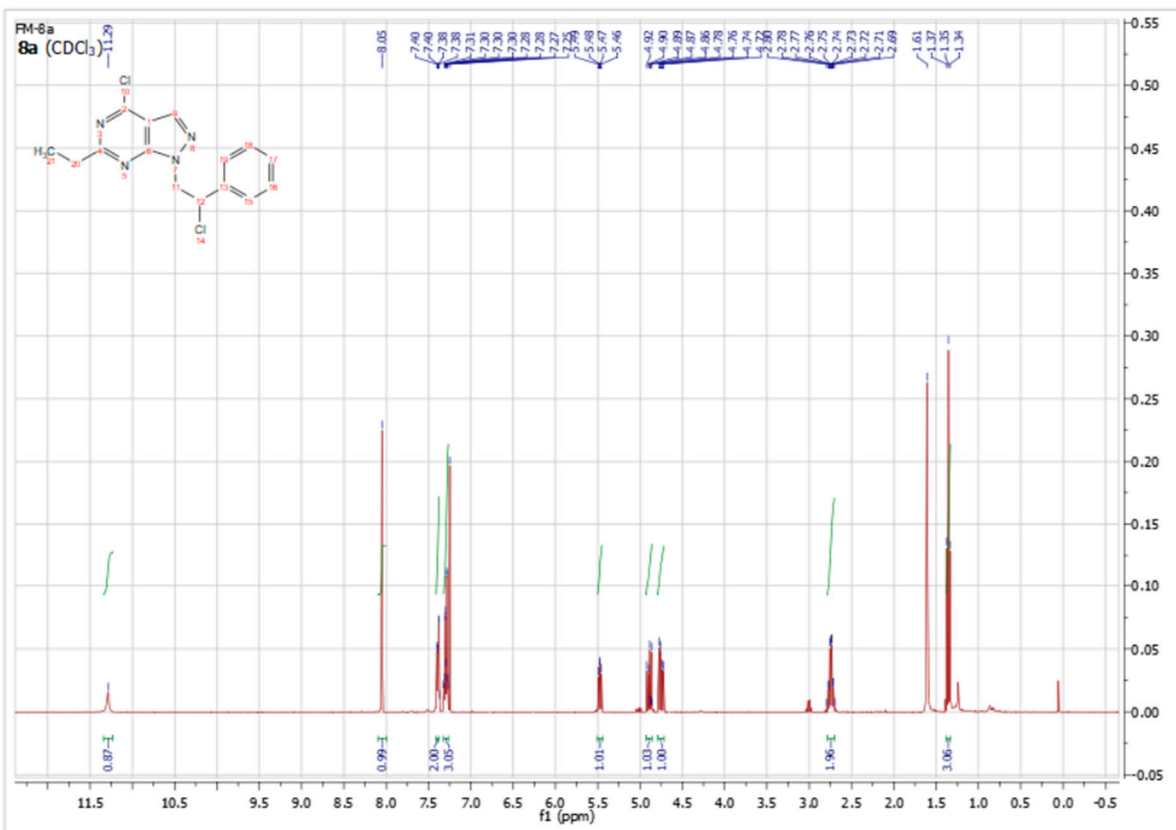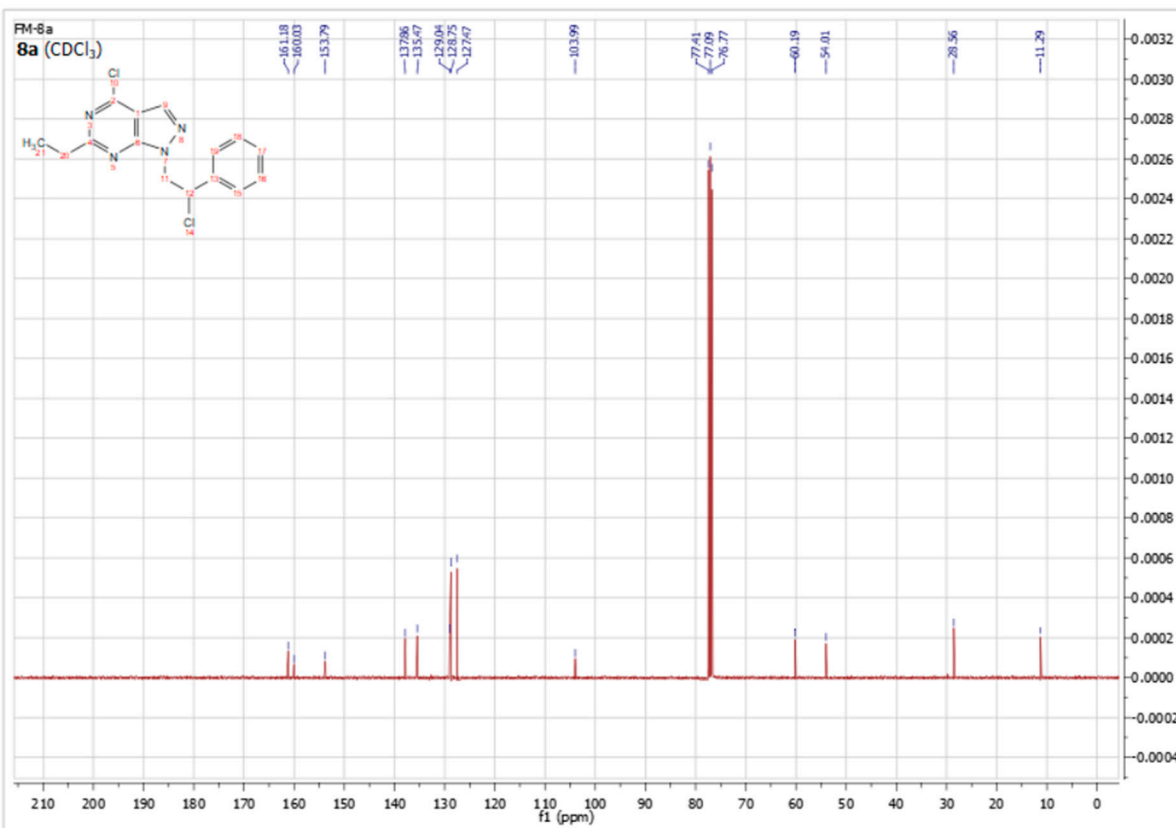

CG66

Pulse Sequence: s2pul  
Solvent: DMSO  
Ambient temperature  
GEMINI-200 "gem2000"

Pulse 28.8 degrees  
Acq. time 2.000 sec  
Width 4000.0 Hz  
112 repetitions  
OBSERVE H1, 199.9427173 MHz  
DATA PROCESSING  
FT size 65536  
Total time 17 min, 58 sec

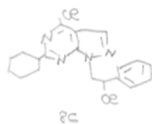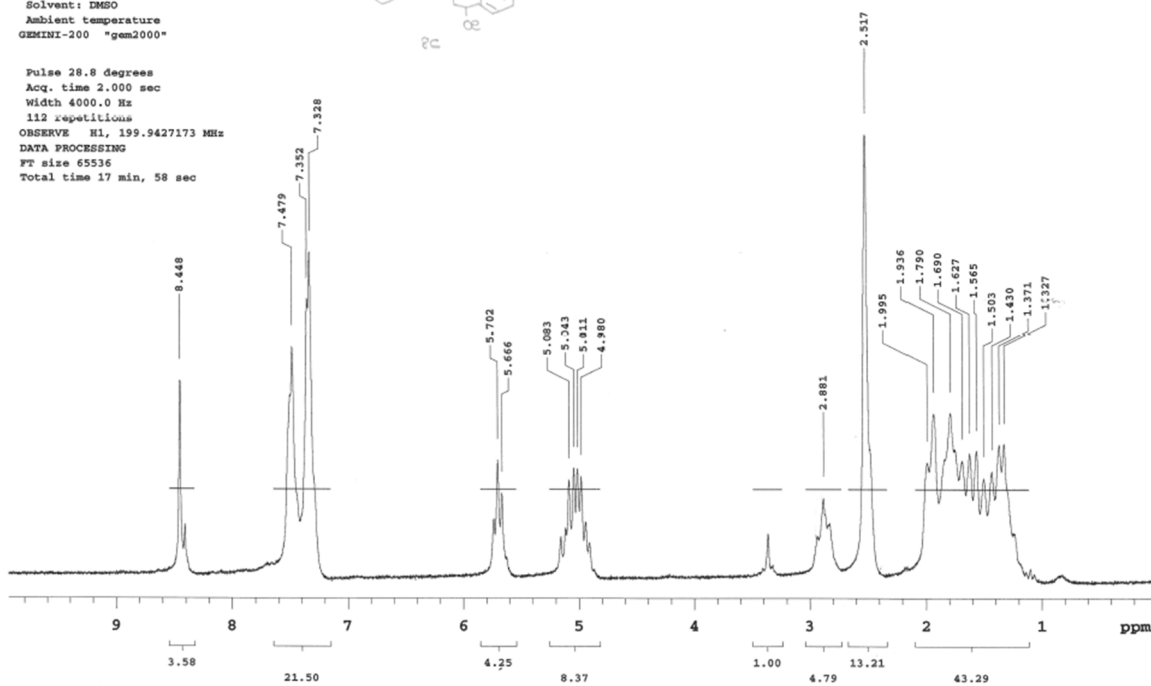

CF3,POCl3/DMF

Pulse Sequence: s2pul  
Solvent: DMSO  
Ambient temperature  
GEMINI-200 "gem2000"

Pulse 28.8 degrees  
Acq. time 2.000 sec  
Width 4000.0 Hz  
512 repetitions  
OBSERVE H1, 199.9427173 MHz  
DATA PROCESSING  
FT size 65536  
Total time 17 min, 58 sec

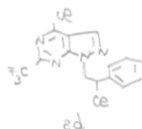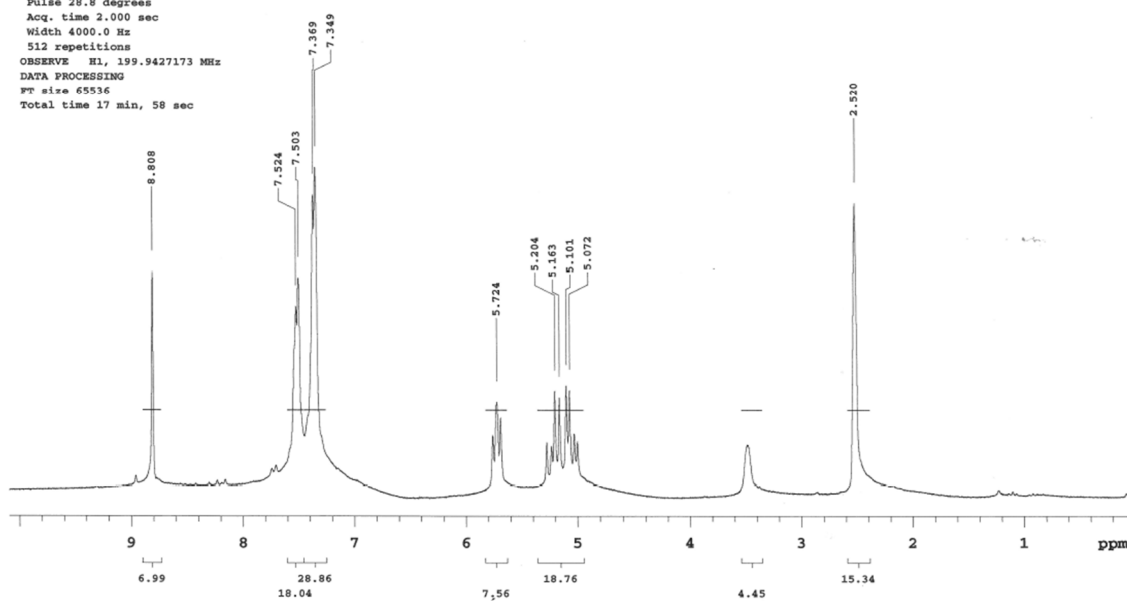

6Ar C1

Pulse Sequence: s2pul  
Solvent: CDCl3  
Ambient temperature  
GEMINI-200 "gem2000"

Pulse 28.8 degrees  
Acq. time 2.000 sec  
Width 4000.0 Hz  
48 repetitions  
OBSERVE H1, 199.941760 MHz  
DATA PROCESSING  
FT size 65536  
Total time 17 min

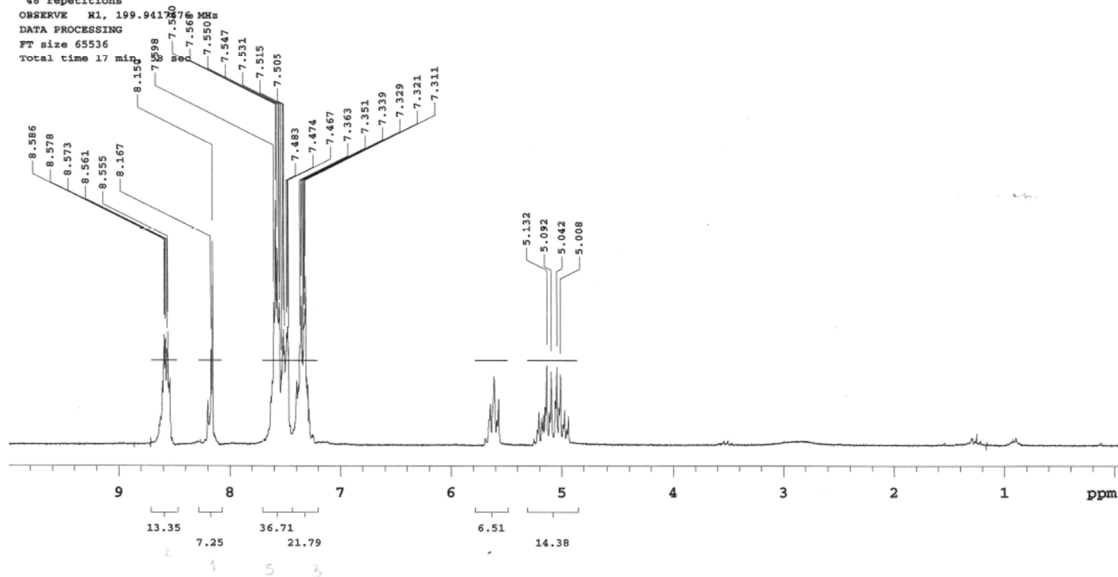

CG63

Pulse Sequence: s2pul  
Solvent: CDCl3  
Ambient temperature  
GEMINI-200 "gem2000"

Pulse 28.8 degrees  
Acq. time 2.000 sec  
Width 4000.0 Hz  
144 repetitions  
OBSERVE H1, 199.9417676 MHz  
DATA PROCESSING  
FT size 65536  
Total time 17 min, 58 sec

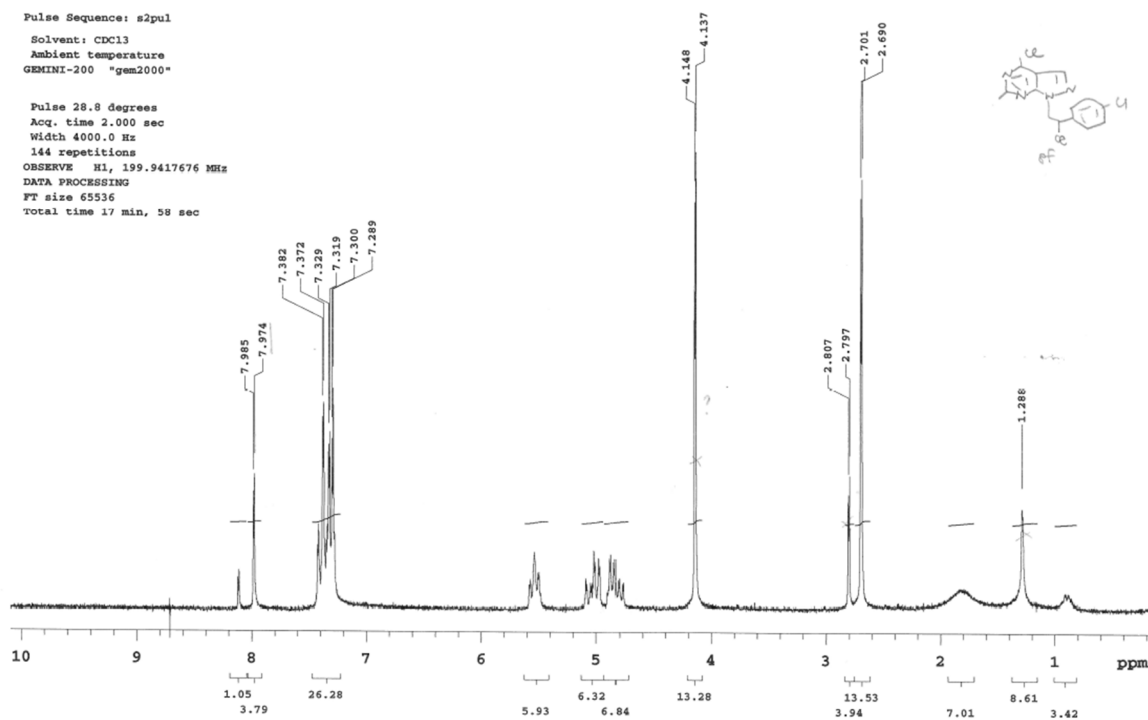

CG62

Pulse Sequence: s2pul

Solvent: DMSO

Ambient temperature

GEMINI-200 "gem2000"

Pulse 28.8 degrees

Acq. time 2.000 sec

Width 4000.0 Hz

64 repetitions

OBSERVE H1, 199.9427173 MHz

DATA PROCESSING

FT size 65536

Total time 17 min, 58 sec

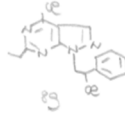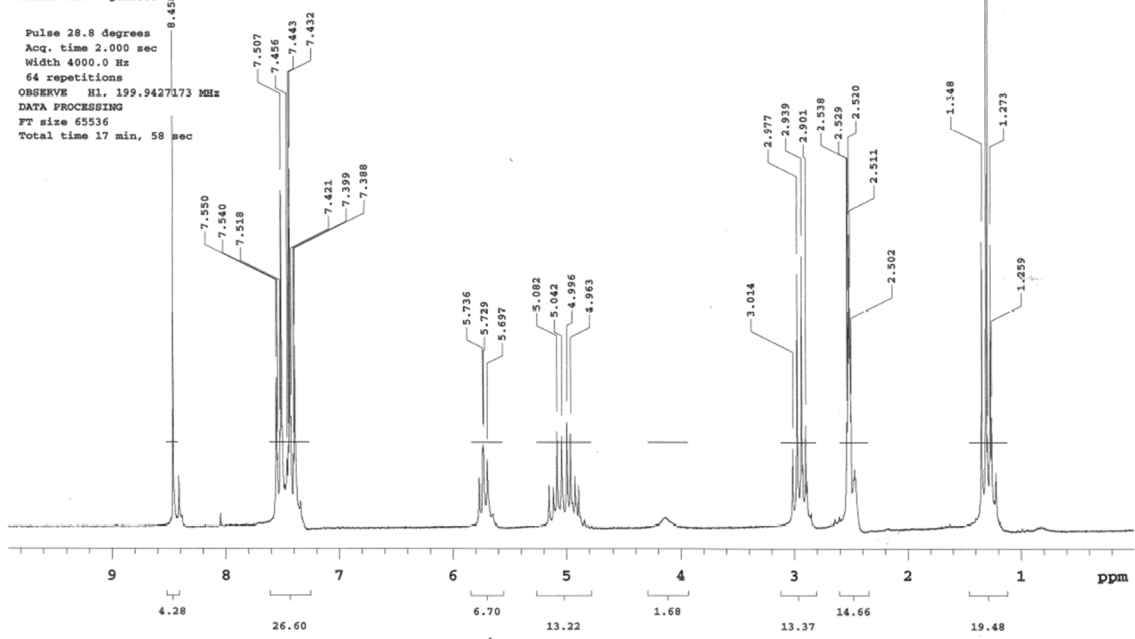

Supplement: s1 [file s1]
